1 **Water transmission potential of *Angiostrongylus***  
2 ***cantonensis*: larval viability and effectiveness of rainwater**  
3 **catchment sediment filters**

4  
5 Kathleen Howe<sup>1¶</sup>, Lisa Kaluna<sup>1¶</sup>, Bruce Torres Fisher<sup>1</sup>, Yaeko Tagami<sup>1</sup>, Robert McHugh<sup>1</sup>, Susan  
6 Jarvi<sup>1</sup>

7  
8 <sup>1</sup>Daniel K. Inouye College of Pharmacy, University of Hawai‘i at Hilo, 34 Rainbow Drive, Hilo,  
9 Hawaii 96720.

10

11 Corresponding author: [jarvi@hawaii.edu](mailto:jarvi@hawaii.edu)

12

13 ¶ These authors contributed equally to this work.

14

15 **Abstract**

16 Neuroangiostrongyliasis, caused by *Angiostrongylus cantonensis*, has been reported in Hawai‘i  
17 since the 1950's. An increase in cases is being reported primarily from East Hawai‘i Island,  
18 correlated with the introduction of the semi-slug *Parmarion martensi*. Households in areas  
19 lacking infrastructure for water must use rainwater catchment as their primary domestic water  
20 supply, for which there is no federal, state, or county regulation. Despite evidence that  
21 contaminated water can cause infection, regulatory bodies have not addressed this potential  
22 transmission route. This study evaluates: 1) the emergence of live, infective-stage *A. cantonensis*  
23 larvae from drowned, non-native, pestiferous gastropods; 2) larvae location in an undisturbed  
24 water column; 3) longevity of free-living larvae in water; and 4) effectiveness of rainwater  
25 catchment filters in blocking infective-stage larvae. Larvae were shed from minced and whole  
26 gastropods drowned in either municipal water or rainwater with >94% of larvae recovered from  
27 the bottom of the water column. Infective-stage larvae were active for 21 days in municipal  
28 water. Histological sectioning of *P. martensi* showed proximity of nematode larvae to the body  
29 wall of the gastropod, consistent with the potential for shedding of larvae in slime. Gastropod

30 tissue squashes showed effectivity as a quick screening method. Live, infective-stage larvae were  
31 able to traverse rainwater catchment polypropylene sediment filters of 20  $\mu\text{m}$ , 10  $\mu\text{m}$ , 5  $\mu\text{m}$ , and  
32 1  $\mu\text{m}$  filtration ratings, but not a 5  $\mu\text{m}$  carbon block filter. These results demonstrate that live,  
33 infective-stage *A. cantonensis* larvae can and do emerge from drowned snails and slugs, survive  
34 for extended periods of time in water, and that the potential exists that they enter the household  
35 water supply. This study illustrates the need to better investigate and understand the potential  
36 role of contaminated water as a transmission route for neuroangiostrongyliasis.

37

## 38 **Introduction**

39 The nematode *Angiostrongylus cantonensis* is established throughout the main Hawaiian Islands  
40 with the possible exception of Lāna‘i [1, 2, 3]. The complex lifecycle of this parasite has been  
41 well-described in the literature [4, 5, 6, 7]. In Hawai‘i, *Rattus rattus* and *Rattus exulans* are  
42 important definitive hosts, and many gastropod species are effective intermediate hosts including  
43 *Achatina fulica*, *Euglandia rosea*, *Laevicaulis alte*, *Limax maximus*, *Parmarion martensi* and  
44 *Veronicella cubensis* [1, 2, 8]. The third stage larva (L3) is harbored in the intermediate host, and  
45 it is this larval stage that is infective to rats and accidental hosts, including humans, as the L3  
46 larvae can safely pass through the acidic environment of the mammalian gut. There are also  
47 paratenic hosts that can carry the infective stage larvae; these include shrimp, prawns, crabs,  
48 frogs, water monitor lizards, centipedes, and some planarians [7, 9, 10, 11, 12]. Of planarians,  
49 the predacious *Platydemous manokwari*, the New Guinea flatworm, has been determined to be  
50 an important carrier of *A. cantonensis* [9].

51

52 Infection by *A. cantonensis* is reported as the leading cause of eosinophilic meningitis (EM)  
53 worldwide [10, 13, 14]. As the parasite targets the central nervous system, the disease can cause  
54 serious and irreparable harm. The first cases of neuroangiostrongyliasis, or rat lungworm disease,  
55 were reported in 1959 on O‘ahu, and both victims died as a result of infection [15]. A review of  
56 medical cases of EM in the State of Hawai‘i from 2001-2005 identified 83 cases of meningitis,  
57 24 of which were attributed to neuroangiostrongyliasis [13]. Hawai‘i Department of Health  
58 (HDOH) reports cluster cases began to occur on Hawai‘i Island in 2004-2005, and there has been  
59 a steadily increasing trend of severe cases, with 107 cases of neuroangiostrongyliasis from 2001-  
60 2017. Of these, 77 have originated from Hawai‘i Island [16].

61  
62 While human infection on Hawai‘i Island has been attributed to “lifestyle” [17], the trend of case  
63 increases actually correlates with the introduction of an effective intermediate host, *P. martensi*  
64 the semi slug, which was first reported on O‘ahu in 1996 and on Hawai‘i Island in 2004 [8]. A  
65 survey conducted in 2005 found a 77.5% infection rate in this species [8] in East Hawai‘i. While  
66 many species can be intermediate hosts, *P. martensi* harbors higher parasite loads compared with  
67 other hosts [2, 18, 19]. Quantification by real-time PCR of *P. martensi* tissue samples collected  
68 in Hawai‘i in 2005 determined an average burden of 445 larvae per 25 mg tissue versus 1-250  
69 for other gastropod species. In 17% of *P. martensi* collected, real-time PCR results showed  
70 burdens of more than 1000 larvae per 25 mg tissue [19]. At these concentrations, it would seem  
71 that ingestion of even a small piece of tissue could cause a serious case of disease. Also, *P.*  
72 *martensi* exhibits unusual behavior in that it is relatively fast, has a propensity to climb, and is  
73 attracted to human dwellings and food items [8]. The increase in cases of  
74 neuroangiostrongyliasis on Maui [16] may be related to the establishment of *P. martensi*  
75 populations which have been anecdotally reported on Maui by an author of this paper (K.H.) and  
76 have been substantiated by Cowie et al. [20].

77  
78 Disease transmission is generally thought to occur from intentional or accidental ingestion of  
79 infected intermediate or paratenic host organisms on unwashed or poorly washed produce or  
80 from undercooked hosts [10,16]. Some patients believe they were infected through exposure to  
81 contaminated rainwater catchment. The use of rainwater catchment as a source of household  
82 and/or agricultural water is prevalent on East Hawai‘i Island, where most cases of  
83 neuroangiostrongyliasis originate. While exact numbers are not known, it was estimated that  
84 30,000-60,000 people relied on catchment water when the Guidelines on Rainwater Catchment  
85 Systems for Hawai‘i manual was written in 2010 [21]. In the Puna District, where most recent  
86 cases have originated [16, 22, 23], there are large subdivisions which were developed in the late  
87 1950's to mid 1970's with little or no infrastructure for water [24]. Today, the majority of  
88 households in this district rely on rainwater catchment for their household water supply and there  
89 is no state or federal agency that oversees the use or management of catchment systems [25]. The  
90 design, installation, and maintenance of rainwater catchment systems can be expensive and  
91 laborious and can create systems that do not provide potable water at all taps, which is required

92 of public water systems. Hawai‘i homeowners with mortgages from the Veterans Affairs are  
93 required to have a copy of the “Guidelines on Rainwater Catchment Systems for Hawai‘i,”  
94 which makes recommendations for roofing, gutters, tanks, tank covers, sediment filters and water  
95 treatments [21]. HDOH recommends but does not require homeowners to implement the  
96 guidelines. Contractors or local vendors can also provide guidance regarding system design,  
97 installation, and maintenance but this information may not be consistent among providers. A  
98 recent survey conducted on Hawai‘i Island showed 90% of respondents used their catchment  
99 water for drinking or bathing, but that only 66% of these respondents had catchment systems that  
100 might be expected to provide water safe to drink [25]. Many residents and catchment tank  
101 cleaners report finding slugs and snails in catchment tanks, likely seeking access for moisture or  
102 having been washed down rain gutters (Fig 1).

103

104 **Fig 1. Slugs inside rainwater catchment tank.** Looking into a rainwater catchment tank with  
105 many *P. martensi* on the plastic liner just above the water line (reflection in water, water intake  
106 pipe, and pulled back cover shown). The tank was tightly covered, however the slugs were still  
107 able to access the tank. Photo credit; R. Hollingsworth.

108

109 Ash [26] examined the morphology of infective-stage (L3) *A. cantonensis* (n = 35) and  
110 determined a mean width of 26  $\mu\text{m}$  with a range of 23-34  $\mu\text{m}$ . The 2010 Rainwater Catchment  
111 Guide states that a 20  $\mu\text{m}$  catchment sediment filter should be sufficient to prevent passage of the  
112 larvae; however, no formal filter studies have been conducted in Hawai‘i. Moreover, many  
113 manufacturers attest that their sediment filters will only “reduce” number of microorganisms and  
114 that their micron sizing is based on nominal particulate ratings of >85% of a given size as  
115 determined from single-pass particle counting results [27]. This rating system does not take into  
116 account microorganism behavior and/or their ability to burrow through or swim around a filter  
117 when the pump system is turned off. Early studies confirm L3 larvae shed from drowned or live  
118 gastropods in water were subsequently infective to rats. Cheng and Alicata [28] demonstrated  
119 that both uninjured and intentionally injured *A. fulica*, *Subulina octona*, and *L. alte* shed larvae  
120 when partially submerged in municipal water. Uninjured snails shed fewer L3 larvae (2-10) than  
121 injured snails (55 L3 larvae). Larvae survived for up to 72 hours and when fed to rats were  
122 recovered as young *A. cantonensis* adults after 17 days. Richards and Merritt [29] confirmed

123 these findings, showing larvae shed from snails into fresh water were active for at least seven  
124 days, and that rats became infected after drinking water containing L3 larvae. A third study by  
125 Crook, Fulton, and Supanwong [30] described *A. fulicia* crawling into wells and water jars, and  
126 well water contamination with *A. cantonensis* was reported. Their study showed that of 30 *A.*  
127 *fulica* drowned in sedimentation funnels, 18 were infected and shed larvae which were used to  
128 successfully infected *Rattus norvegicus*. If rats can be infected by drinking L3 contaminated  
129 water it is possible that humans and other mammals may also be infected in this manner.  
130 Currently, no studies have been conducted in Hawai'i to determine the larval shedding potential  
131 of the efficient, recently introduced intermediate host *P. martensi*.

132

133 The relationship between the widespread use of rainwater catchment and/or exposure to  
134 contaminated water sources, the introduction of the effective intermediate host *P. martensi*, and  
135 the high incidence of neuroangiostrongyliasis on Hawai'i Island may be of epidemiological  
136 significance. Therefore, this study was conducted to evaluate the larval shedding potential of  
137 drowned gastropods, particularly of *P. martensi*, and to assess larval longevity in water. A pilot  
138 study was also initiated to evaluate the effectiveness of commercially available sediment filters  
139 in reducing or blocking *A. cantonensis* larvae in a laboratory-based model catchment system.

140

## 141 **Materials and methods**

### 142 **Gastropod collection and preparation**

143 Slugs and snails used in all studies were non-native considered invasive species. Specimens  
144 were collected in the the Koa'e and Wa'a Wa'a area in the lower Puna District of Hawai'i Island  
145 and in the nearby Hilo District, both areas of known *A. cantonensis* infection. Collection sites in  
146 Puna were on private land and approximately a three linear-mile distance from each other (Fig  
147 2). In Hilo, collecting was done on the campus of the University of Hawai'i. Captured gastropods  
148 were held in individual collection tubes or bags to avoid cross-contamination. Species collected  
149 included *A. fulica*, *L. alte*, *P. martensi*, and *V. cubensis*; however, *P. martensi* was the primary  
150 gastropod of interest. Tissue tail snips were excised and weighed from all gastropods except  
151 where noted. Tissue samples were used for tissue squashes or placed in 100  $\mu$ L DNA lysis buffer  
152 (0.1M Tris HCl, 0.1M EDTA, 2% SDS) for subsequent genetic analysis. The remainder of the

153 gastropod was placed in a 50 mL falcon tube filled with rainwater or municipal water, and  
154 inverted until the gastropod was deceased.

155

156 **Fig 2. Map of gastropod collection sites.** Gastropods were collected on the east end of Hawaii  
157 Island in the Wa‘a Wa‘a and Koa‘e area, and in Hilo, on the University of Hawaii campus.

158

## 159 **Potential for shedding of *A. cantonensis* larvae by drowned**

### 160 **gastropods**

#### 161 **Rainwater collection**

162 Rainwater was collected in a clean, food-grade, ~19 L bucket placed below the drip edge of a  
163 clean, gutter-less metal roof and was transferred into clean two-liter glass jars. Control samples of  
164 water (15 mLs) were pipetted into sterile 60mmX 15 mm disposable petri dishes and regularly  
165 observed by microscopy for evidence of larvae using a dissecting microscope (Leica EZ4,  
166 Wetzlar, Germany). Samples were labeled and held at room temperature (~21° C) and were  
167 repeatedly inspected over the course of the trial for evidence of emerged larvae. A 200µL sample  
168 of the rainwater was tested with real-time PCR (see below) for presence/absence of the parasite  
169 [18, 31].

170

#### 171 **Larval location in a water column**

172 Water from gastropods drowned for whole vs minced and diversified gastropod species  
173 experiments was used to evaluate the distribution of larvae in a water column after a gastropod  
174 drowning event. Water samples (5 mL) were pipetted from three locations in tubes containing a  
175 gastropod drowned in rainwater: the top, the middle, and the bottom (TMB) of the 50 mL water  
176 column. Each 5 mL sample was placed into a petri dish and 10 mL of additional water added to  
177 the dish to prevent drying. After sampling, each Falcon tube was topped off with rainwater. The  
178 first samples were drawn within 24 hours post drowning (PD). Samples were then taken at 24-  
179 hour intervals for as few as five, and as many as 20 days PD. Petri dishes were held at room  
180 temperature (~ 21° C) and were routinely examined (24 -72 hours) for evidence of larvae by  
181 microscopy. Larvae were counted, photographed, and isolated for genetic analysis. All  
182 photography of larvae was done using an Olympus CX31 compound microscope and LW

183 Scientific MiniVID USB 5MP Digital Eyepiece Camera (Lawrenceville, GA) and ToupView v.  
184 3.7.

185

### 186 **Whole versus mechanically minced *P. martensi***

187 As the literature suggested that damaged gastropods shed more larvae, a trial was conducted  
188 using *P. martensi* to determine if this species could shed larvae when drowned, and if damage  
189 had an effect on larval shedding. Ten *P. martensi* slugs were collected and processed as  
190 described above, and then randomly assigned to a treatment group (whole n = 5, or minced n =  
191 5). Slugs were mechanically minced with single-use safety blades and placed in 50 mL rainwater  
192 and whole slugs were drowned in rainwater. Samples were taken from the TMB at 24-hour  
193 intervals over a 96-hour timeframe. Petri dishes were examined daily for ten consecutive days  
194 for the quantity of larvae. Two-sample t-tests (Minitab 18) were used to evaluate the difference  
195 in mean larval loads, as determined by qPCR, the difference in slug weights, and differences in  
196 numbers of larvae shed between whole versus minced slugs.

197

### 198 **Diversified gastropod species**

199 Larval shedding was evaluated across multiple gastropod species including *A. fulica* (n = 4), *L.*  
200 *alte* (n = 2), *V. cubensis* (n = 2), and *P. martensi* (n = 4). Gastropods were collected, species were  
201 equally divided into treatment groups (whole or minced) and processed as described above in  
202 rainwater. Water samples (5 mLs) were taken from the TMB for examination of larvae, with  
203 sampling beginning at day 0, and samples taken every 24 hours for 20 days with volumes  
204 replaced daily.

205

### 206 **Sieve separation of varied-size larvae and longevity trials**

207 Ash [26] reported L3 larvae diameters of 23-34  $\mu\text{m}$ , which is close to the 20  $\mu\text{m}$  sediment filter  
208 size recommendation from the Guidelines on Rainwater Catchment Systems in Hawai'i [21].  
209 Trials were conducted to separate and identify larvae shed from drowned, mechanically damaged  
210 gastropods (*L. alte* = 2, *P. martensi* = 2). Shed, active larvae of various sizes, which were never  
211 observed to be coiled in form, were challenged to traverse a 20  $\mu\text{m}$  metal sieve (Hogentogler &  
212 Co., Columbia, Maryland). The sieve was seated in a beaker with a volume of municipal water

213 covering the top of the mesh and larvae were pipetted onto the sieve. The sieve was removed  
214 after 24 hours and the liquid below was examined by microscopy. Larvae found below the sieve  
215 were removed from the beaker by pipette and were held in petri dishes. A subsample of these  
216 larvae was placed into acid (0.5% HCl/0.5% pepsin) to observe larval reaction [2]. The  
217 remaining larvae (~1000) were held to determine longevity. Subsamples of these larvae (~250)  
218 were processed for genetic analysis at 53 and 56 days PD. Shed larvae, which were initially  
219 observed to be coiled and had emerged into active larvae, were also challenged to traverse the  
220 sieve. Subsamples were exposed to acid and were held for observation for longevity. At 21 days  
221 PD ~80 larvae were isolated for genetic analysis. C-shaped larvae were not used in sieve trials as  
222 these larvae were never observed to be active. The sieve was soaked in a 15% salt solution for 20  
223 minutes, rinsed in soapy water followed by a fresh water rinse, dried at ~ 50° C, and exposed to  
224 2000 Joules of UV radiation (UVP CX-2000 UV Crosslinker, Upland, CA) to destroy any DNA  
225 between trials.

226

## 227 **Municipal water versus rainwater**

228 *P. martensi* (n = 16) were used to determine if water source had an effect on larval shedding.  
229 Tail snips were taken from 10 slugs for subsequent real-time PCR testing and six were left whole  
230 with no tail snips taken. The slugs were divided into two treatments: 50 mL of either municipal  
231 water or rainwater (tail snip slugs n = 5 per group, and whole slugs n = 3 per group). Three 5 mL  
232 samples were drawn from the bottom of tubes at 24, 48, 72, and 96 hours PD and placed into  
233 individual petri dishes. All samples drawn were examined daily and larvae were counted and  
234 isolated for genetic analysis.

235

## 236 **Tissue squash to screen for presence of larvae**

237 To determine the effectiveness of tissue squashes as a screening method for nematode infection  
238 in slugs, a small piece of tail tissue (~5 mg) was removed from the tail snip of *P. martensi* (n =  
239 10) for evaluation. The remaining tail snip was used for genetic analysis. Tissue was placed  
240 between two glass slides and pressure was applied until a thin film was achieved. The slide was  
241 examined with an Olympus CX31 compound microscope for visualization of larvae.

242



## 243 **Histology**

244 Several *P. martensi* were prepared using traditional histological methods to examine location of  
245 larvae in the tissue [32]. The shells were first removed and gastropods were immersed in glacial  
246 acetic acid for 24 hours to dissolve any remaining shell fragments. The specimens were fixed in  
247 10% formalin for 48 hours and then transferred to 70% ethanol, after which they were cut  
248 laterally into three sections (head, middle, tail). The sections were processed in a tissue processor  
249 (Leica TP 1020, Leica Microsystems Inc., Bannockburn, IL), blocked in wax, cut in 7 $\mu$ m  
250 sections which were placed on glass slides, and stained with traditional hematoxylin and eosin.  
251 Slides were examined with an Olympus CX31 compound microscope. Sections containing larvae  
252 were photographed as described above.

253

## 254 **Catchment Sediment Filter Testing**

255 A laboratory-based catchment system (Fig 3) was constructed replicating a home design  
256 common in East Hawai'i dwellings, with the exception of the size of the water reservoir and the  
257 absence of a separate pressurized tank [21]. All components were approved for potable water  
258 use. A 132 L pressure tank (Sta-rite SR35-10S) was used as a water reservoir, filled with  
259 municipal water, and connected directly to a water pump (Grundfos 96860195). Polyvinyl  
260 chloride (PVC) piping in 3/4" diameter (JM Eagle 57471) connected all components of the  
261 system. PVC primer and cement (Oatey 30756, and 31013) was used to seal all non-threaded  
262 connections and plumbers' tape (Oatey 0178502) was used to seal all threaded connections. A  
263 pressure gauge (ASME B40.1:1991) was installed just prior to the nematode loading station to  
264 ensure pressure during testing replicated a home environment. A one-way check valve (ProLine  
265 101-604HC) was installed just prior to the nematode loading station, to prevent backflow of  
266 experimental nematodes into the system. Two PVC ball valves (ProLine 107-634HC) cut off  
267 water flow just prior to the filter housing, in between these, a tee socket fitted with a socket male  
268 adapter and threaded cap (Charlotte 187917, 188131, and 536725) allowed for loading of  
269 experimental nematodes for each trial. Five commercially available sediment filters, obtained  
270 from local vendors, were tested inside a universal housing (Pentair 158215). Filtrate was directed  
271 into a 19 L water bottle (ORE International WS50GH-48) through vinyl tubing (Watts

272 032888192362). The mouth of the water bottle was fitted with flexible PVC coupling (Fernco  
273 687960) and a PVC ball valve (ProLine 107-634HC) to use as a spigot.

274

275 **Fig 3. Design of the laboratory-based catchment system.** Basic layout of the model catchment  
276 system used, with a (A) 132-liter water reservoir, (B) a water pump, (C) a pressure gauge, (D) a  
277 nematode loading station, (E) universal housing with sediment filter, and (F) a 19-liter collection  
278 tank with a spigot all connected with  $\frac{3}{4}$ " PVC piping. (Figure is not accurately scaled).

279

280 For each trial, live nematodes were individually isolated into fresh municipal water from whole,  
281 intact *P. martensi* collected in the Hilo area and drowned in a 50 mL Falcon tube of municipal  
282 water as described above. Prior to loading into the system, nematodes were visualized on a  
283 stereoscope (Wild Heerbrugg M5A APO) where ~16% of nematodes were photographed at 50X  
284 total magnification, using a microscope digital camera (MiniVID TP605100) and software  
285 (ToupView 3.7). Length and diameter of nematodes were measured using ToupView 3.7  
286 following calibration with a stage micrometer (American Optical 1400). Width was measured at  
287 the widest point of the nematode, as determined by visual analysis. Nematodes were added to the  
288 loading station as described above. The water pump was run for approximately 10 seconds,  
289 yielding roughly 10 L of filtrate in the collection tank. The filtrate was immediately transferred  
290 into 1-liter bottles and then vacuum filtered across a 0.2  $\mu\text{m}$  nylon filter (Whatman 7402-004) to  
291 concentrate and isolate post-filter nematodes. Nematodes on the surface of the 0.2  $\mu\text{m}$  filter were  
292 rinsed off using a wash bottle of municipal water and observed by microscopy. Resulting  
293 nematodes were counted, observed for movement, and up to 25 nematodes per filter were  
294 measured and isolated for genetic analysis. The nematodes isolated for genetic analysis were  
295 kpooled per individual filter. Measurements of post-filter nematodes for the first replicate of the  
296 1  $\mu\text{m}$  spun polypropylene filter were not obtained due to an inability to obtain high resolution  
297 images of decomposing nematodes from a six-day delay in observing the vacuum filtrate. The  
298 proportion of pre- and post-filter nematodes that were infective *A. cantonensis* L3 larvae was  
299 calculated by comparing nematode length to that previously reported [26]; width would be an  
300 inappropriate comparison as the location of measurement on the nematode was nonspecific.  
301 Morphological analysis was used in conjunction with genetic analysis to determine whether  
302 infective *A. cantonensis* L3 larvae were among the post-filter nematodes for each filter replicate.

303  
304 New filters of each type of sediment filter were tested in either duplicate or triplicate. Each  
305 individual filter was left in the system continuously for four runs of 250 nematodes loaded in  
306 runs 1 and 2, and 500 nematodes loaded in run 3. Time between runs 1-3 was contingent upon  
307 nematode availability and varied from 15 minutes to 16 days. To see if previously introduced  
308 nematodes could live in or on the filter and penetrate it over time, the system was run a fourth  
309 time, seven or eight days after run 3, without loading additional nematodes. Following the fourth  
310 run of a filter, the catchment system was disinfected by allowing a 10% bleach solution to  
311 completely fill the system and collection tank for 20 minutes. Subsequently, the entire system  
312 was thoroughly rinsed with municipal water by running nearly 390 L of water through the  
313 system (3 volumes of the water reservoir) before a new filter was installed. Each new filter was  
314 flushed with municipal water for 15 minutes before testing. Nematode loss from the system and  
315 vacuum filtration process was independently measured to establish recovery rates. To test  
316 nematode loss from the entire testing process, excluding the catchment sediment filter, three runs  
317 of 250 nematodes each were tested in the system (including vacuum filtration) with no sediment  
318 filter inside the housing. To test nematode loss attributable to the vacuum filtration process, 100  
319 nematodes were added to just the vacuum filtration apparatus and counted three times, post-  
320 vacuum filtration.  
321 Data analysis: As not all data were normally distributed, non-parametric Kruskal-Wallis tests  
322 were used to test for significant differences between the proportions of post-filter nematodes  
323 between filter type and between runs within each filter test. Non-parametric Wilcoxon tests were  
324 used to examine the differences in the number of post-filter nematodes between replicates of the  
325 20  $\mu\text{m}$  and 10  $\mu\text{m}$  filters, and a Kruskal-Wallis test for the 5  $\mu\text{m}$  spun replicates. Statistical  
326 analysis was conducted in Minitab 18.

327

## 328 **Development of Cloned Reference Standards**

329 Plasmids used for standards and positive controls were made by cloning the amplicon of an *A.*  
330 *cantonensis* larval sample used in Jarvi et al. [18]. The target region was amplified from genomic  
331 DNA using real-time PCR as described above. The amplification product was removed from a  
332 2% low-melt agarose gel and purified using a DNA, RNA, and protein purification kit  
333 (Macherey-Nagel 740609.240C) following the manufacturers protocol. The purified product was

334 cloned using the Invitrogen TOPO TA Cloning Kit for Sequencing (Thermo Fisher Scientific  
335 K4575J10) and colonies were screened for the target insert by PCR, all per manufacturer's  
336 protocol. Colonies with the target insert were grown overnight at 37° C in 7 mL of TYE medium  
337 containing 50 µg/mL ampicillin, and plasmids were isolated using a QIAprep Spin Miniprep Kit  
338 (Qiagen 27104) per the manufacturer's protocol. Plasmids were sequenced with M13F/M13R  
339 primers on an Applied Biosystems 3730XL DNA Analyzer at the Advanced Studies in  
340 Genomics, Proteomics and Bioinformatics Sequencing Facility at the University of Hawai'i at  
341 Manoa. The sequences were verified using the GenBank BLAST analysis. One plasmid was  
342 chosen for use in real-time and quantitative PCR. Eight serial dilutions (1:10 - 1:10<sup>8</sup>) of the  
343 chosen plasmid were made using Buffer AE (Qiagen); 1-2 µl were quantified by qPCR using the  
344 same methods and genomic DNA described in Jarvi et al. [18] and analyzed as described above.  
345 All samples, standards, and non-template controls were run in duplicate. After analyzing the  
346 standard curve, the mean quantities (# larvae per reaction) of the eight plasmid dilutions were  
347 used in the qPCR run testing the gastropods described below.

348

### 349 **qPCR of gastropod tissue**

350 DNA extractions were completed using a DNeasy Blood & Tissue Kit (Qiagen 69506) per the  
351 manufacturer's Animal Tissue protocol with a few adjustments. Gastropod tissues in 100 µl DNA  
352 lysis buffer were digested with 180 µl of buffer ATL and 20 µl of proteinase K, ending with a  
353 final elution of 400 µl. DNA was quantified using a Bio-Spec Nano (Shimadzu Scientific  
354 Instruments Inc., Carlsbad California). Extracted DNA was subjected to qPCR using species-  
355 specific primers that were redesigned into a custom assay [18, 31]. Samples were run in  
356 triplicate. Reactions were run on a StepOne Plus RealTime PCR system (Life Technologies,  
357 Carlsbad CA) with minimum modifications to the assay manufacturer's cycling conditions (1  
358 cycle of 50°C for 2 min, 95°C for 10 min, followed by 40 cycles of 95°C for 15 sec, 60°C for 1  
359 min). Optical tubes (Life Technologies 4358297) were exposed to ten minutes of ultra-violet  
360 radiation (UVC, 254 nm) and reactions were 20 µl in volume with either 100 ng of total DNA  
361 per reaction or the maximum allowed template volume of 9 µl.

362 Data analysis: StepOne Software v2.3 was used for analysis of all runs using the auto-threshold  
363 setting and verifying all replicates of non-template controls had no exponential amplification  
364 before data was used. Samples and standards were determined positive if all replicates showed

365 exponential amplification in both the ' $\Delta$  Rn vs Cycle' and 'Rn vs Cycle' plot types with a cycle  
366 threshold standard deviation (CTSD) of <0.5. The number of larvae per mg of tissue in the tail  
367 snips was determined as follows:

368 # of larvae/mg = (# larvae per reaction/ template vol ( $\mu$ l))  $\times$  Final elution vol (400  $\mu$ l)/ tail snip  
369 weight (mg)

370

## 371 **Real-time PCR of larvae**

372 Larvae shed from gastropods were collected by pipette for real-time PCR analysis into DNA  
373 lysis buffer, allowed to settle, and supernatant was removed leaving ~100  $\mu$ l of liquid. The  
374 concentrated larvae were homogenized in a glass tissue grinder for approximately five minutes  
375 and DNA was extracted as described above. The tissue grinder was cleaned with a 10% bleach  
376 solution and thoroughly rinsed between uses. Post-filter nematodes from the catchment sediment  
377 filter trials were isolated by pipette and DNA was extracted as above with a final elution of 50  
378  $\mu$ l. Larvae samples were run in either duplicate or triplicate with positive controls of plasmid  
379 standards for the determination of the presence of *A. cantonensis* DNA.

380

## 381 **Results**

### 382 **Potential for shedding of *A. cantonensis* larvae by drowned**

#### 383 **gastropods**

##### 384 **Rainwater**

385 At no time were larvae or other live organisms observed by microscopy in the 10 mL samples of  
386 clean rainwater collected. The real-time PCR result for the 200  $\mu$ L rainwater sample was  
387 negative for *A. cantonensis*.

388

##### 389 ***P. martensi* (whole vs minced)**

390 Larvae were shed from both whole (n = 5) and minced (n = 5) *P. martensi* that were drowned in  
391 rainwater, and qPCR results of all tail snips were positive for *A. cantonensis* (Table1). There was  
392 no significant difference in weight between the whole and minced groups ( $P = 0.586$ ).

393 Quantification of *A. cantonensis* in the tail snips ranged from 4.62-39.20 larvae per milligram of

394 tissue. Cycle threshold ( $C_T$ ) values of the standards ranged from 16-32 cycles and the unknown  
 395 samples were 20-26 cycles, all with CT SD < 0.5. The standard curve had an  $R^2$  value of 0.961, a  
 396 slope of -3.677, a y-intercept of 22.862, and a PCR efficiency of 87.051%. The larvae load  
 397 averages between treatment groups was not significant ( $P = 0.590$ ), but the numbers of total  
 398 larvae shed between treatment groups was significant ( $P = 0.043$ ) with greater numbers shed by  
 399 whole *P. martensi*. Noticeable larval shedding occurred at 72 and 96-hours post-drowning (PD).  
 400 Shed larvae were observed to be either coiled or C-shaped and inactive. The coiled larvae were  
 401 observed to emerge from this state to become vigorously swimming larvae, while the C-shaped  
 402 larvae exhibited no movement or emergence. The C-shaped larvae fit the description of L2  
 403 larvae as described by Lv et al. [33]. The active larvae had the morphological features of the L3  
 404 *A. cantonensis* and displayed the characteristic S and Q-movement described for *A. cantonensis*  
 405 and not displayed in other free-living nematode species [33]. At ten days PD > 200 actively  
 406 swimming larvae remained in petri dish samples. Of the three sampling locations, the bottom  
 407 samples contained 93.5% of all larvae shed.

408

409 **Table 1. The total number of live larvae shed by the two treatment groups of *P. martensi* at**  
 410 **0, 24, 48, 72, and 96 hours post-drowning.** The average weight of the gastropods between  
 411 treatment groups is not significant ( $P = 0.586$ ) and the mean quantity of larvae per milligram of  
 412 tissue estimated by real-time PCR between treatment groups is not significant ( $P = 0.590$ ),  
 413 however the numbers shed between treatment groups was significant ( $P = 0.043$ ). (PD = post  
 414 drowning).

| Treatment | Sample         | 0 hr.<br>PD | 24 hr.<br>PD | 48 hr.<br>PD | 72 hr.<br>PD | 96 hr.<br>PD | Whole<br>Slug wt.<br>(g) | Quantity<br>Mean/mg<br>tissue |
|-----------|----------------|-------------|--------------|--------------|--------------|--------------|--------------------------|-------------------------------|
| Whole     | Slug 1         | 0           | 3            | 0            | 170          | 139          | 1.34                     | 20.38                         |
|           | Slug 2         | 0           | 0            | 1            | 60           | 0            | 1.73                     | 17.45                         |
|           | Slug 3         | 0           | 0            | 0            | 10           | 28           | 1.54                     | 23.73                         |
|           | Slug 4         | 0           | 0            | 0            | 139          | 0            | 1.85                     | 15.20                         |
|           | Slug 5         | 0           | 0            | 0            | 10           | 13           | 2.17                     | 8.57                          |
|           | <b>Total</b>   | <b>0</b>    | <b>3</b>     | <b>1</b>     | <b>389</b>   | <b>180</b>   |                          |                               |
|           | <b>Average</b> |             |              |              |              |              | <b>1.73</b>              | <b>17.07</b>                  |
| Minced    | Slug 1         | 0           | 0            | 0            | 1            | 23           | 1.58                     | 13.07                         |
|           | Slug 2         | 0           | 0            | 0            | 4            | 1            | 1.85                     | 17.10                         |
|           | Slug 3         | 2           | 0            | 0            | 1            | 0            | 1.95                     | 28.56                         |
|           | Slug 4         | 0           | 0            | 4            | 0            | 0            | 1.47                     | 4.62                          |

|  |                |          |          |          |           |           |             |              |
|--|----------------|----------|----------|----------|-----------|-----------|-------------|--------------|
|  | Slug 5         | 0        | 0        | 0        | 16        | 2         | 2.39        | 39.20        |
|  | <b>Total</b>   | <b>2</b> | <b>0</b> | <b>4</b> | <b>22</b> | <b>26</b> |             |              |
|  | <b>Average</b> |          |          |          |           |           | <b>1.85</b> | <b>20.51</b> |

415

## 416 **Diversified gastropod species**

417 Of the gastropods used in this study, only those that shed larvae or whose tail snips were positive  
418 for *A. cantonensis* by qPCR are reported. Two *L. alte* tested positive by qPCR; however, only  
419 the minced *L. alte* shed larvae. An unminced *A. fulica* had positive qPCR results but did not shed  
420 larvae. Two of the whole *P. martensi* shed larvae and one was positive by qPCR. Coiled, C-  
421 shaped, and motile larvae were again observed in samples taken at 48 hours PD. Coiled larvae  
422 (L3) emerged into active larvae displaying the S and Q motion, while C-shaped larvae (L2  
423 larvae) were never observed to become motile. Again, the greatest number of larvae found were  
424 in bottom samples (95.4%). Low numbers of larvae were shed in the first 48 hours, after which  
425 the incidence of shedding increased, and then began to drop off after 96 hours PD, however,  
426 very low numbers of larvae continued to be shed up to 17 days PD.

427

428 One qPCR negative *P. martensi* and one positive *L. alte* shed copious amounts of larvae which  
429 were observed in petri dishes over time. In addition to the coiled, C-shaped larvae, and several  
430 motile larvae in samples taken at 48 hours PD, there was observed in the petri dishes containing  
431 the 5 mL samples taken at 24 and 48 hours PD, a gradual emergence of vigorously moving,  
432 varied-sized larvae, the numbers of which increased over time, peaking at seven and eleven days  
433 after the sample was drawn, with counts of ~ 900 larvae in some dishes ( Fig. S1). These larvae  
434 were likely emerging from tissue and slime shed by the drowned gastropods. Some of these  
435 larvae exhibited the S and Q-movement said to be specific to *A. cantonensis* and when observed  
436 by microscopy, these larvae had the clear distinction at the esophagus-intestine junction and a  
437 posterior section dense with refractive granules (Fig 4a), indicative of L1 larvae [33]. Real-time  
438 PCR of a concentrated sample of several hundred larvae was positive for *A. cantonensis*  
439 indicating a presence of this nematode in the sample.

440

441 **Fig 4. Images of *A. cantonensis*.** a. L1 larvae with distinctive junction of esophagus and  
442 intestine in the anterior section, posterior section is dense with reflective granules (10µm). b. L3  
443 larvae with knob-like tips (KT) and rod-like structure (RT) in head, clear division of esophagus

444 bulbus (EB), excretory pore (EP), and anus (A). c. Tissue squash from *P. martensi* showing C-  
445 shaped L2 larvae with dark interiors. d. Histology section of *P. martensi* showing coiled larvae  
446 very close to edge of the body wall.

447

#### 448 **Sieve separation of larval stages and longevity trials**

449 The use of a 20 µm sieve allowed for sorting of varied-sized larvae to determine larval stage and  
450 longevity of motile L1 and L3 larvae. Larvae found below the sieve were held alive for 53 days  
451 and 56 days respectively, and when a subsample was subjected to a 0.5% HCl/pepsin mix, larvae  
452 dissolved. Real-time PCR testing of ~ 250 larvae held for molecular analysis showed positive  
453 results for *A. cantonensis*. These appeared to be L1 larvae based on size, sensitivity to acid, and  
454 real-time PCR results. Coiled larvae that had emerged into swimming larvae were not able to  
455 traverse the sieve and the addition of 10 mL of 0.5% HCl to a subsample did not cause larvae to  
456 dissolve. Larvae held in water were active for at least 21 days, with activity decreasing over  
457 time. When acid was added to this subsample, the motionless larvae became vigorously active  
458 again. Structural characteristics of *A. cantonensis* [33] could clearly be recognized, including the  
459 knob-like tips and a rod-like structure in the head, the clear division of the esophagus bulbus, the  
460 excretory pore, and the anus (Fig 4b). Real-time PCR of 80 of these active larvae showed  
461 positive results for *A. cantonensis*. Based on all of these findings, these appeared to be L3  
462 larvae.

463

#### 464 ***P. martensi* (municipal versus rainwater)**

465 All *P. martensi* with tail snips taken (n = 10) but otherwise left whole were observed to shed  
466 larvae at 24 hours and continued to shed larvae up to 96 hours PD. All 10 slugs and shed larval  
467 samples were positive for *A. cantonensis* by real-time PCR. All entirely whole (no tail snips  
468 taken) *P. martensi* (n = 6) shed larvae at 24 hours and continued to shed larvae up to 72 hours at  
469 which point observations were concluded. Shed larvae were again viewed as coiled and C-  
470 shaped. One of the whole slugs drowned in rainwater released a clear, mucilaginous mass  
471 (presumed to be slime) that contained a count of 328 larvae at day 5 PD.

472

#### 473 **Tissue squashes to screen for presence of larvae**

474 Real-time PCR of all 10 specimens with tail tissue taken showed positive results for *A.*



475 *cantonensis*. All tissue squashes revealed both coiled and C-shaped larvae. The C-shaped larvae  
476 had a clear distinction between the esophagus-intestine line indicative of L2 larvae [33, 34] (Fig  
477 4c).

478

## 479 **Histology**

480 Traditional histological techniques were useful in examining the location of larvae in the *P.*  
481 *martensi* host. Larvae were found throughout the body and were often located near the foot,  
482 mantle covering, and very close to the body wall (Fig 4d).

483

## 484 **Catchment Sediment Filter Testing**

485 Live nematodes, including *A. cantonensis* larvae, were able to traverse all sediment filters except  
486 that of the 5  $\mu\text{m}$  carbon block filter (Table 2). There were no significant differences found  
487 between proportions of post-filter nematodes between replicate runs for the 20  $\mu\text{m}$  ( $P = 0.999$ ),  
488 10  $\mu\text{m}$  ( $P = 0.081$ ), and 5  $\mu\text{m}$  spun ( $P = 0.558$ ) filters. There were no significant differences  
489 found between proportions of post-filter nematodes between runs within each filter for the 20  $\mu\text{m}$   
490 ( $P = 0.180$ ), 10  $\mu\text{m}$  ( $P = 0.867$ ), and 5  $\mu\text{m}$  spun ( $P = 0.105$ ) filters. There were no values for the 5  
491  $\mu\text{m}$  carbon block and the 1  $\mu\text{m}$  filter, so no P-values could be generated. A significant difference  
492 was found in comparisons between filter type ( $P = 0.0001$ ), with the 10  $\mu\text{m}$  having the highest  
493 proportion of post-filter nematodes as compared to the other filters. All positive filtrates  
494 contained nematodes with widths greater than the micron size listed for the manufacturer's  
495 nominal filtration rating. Nematodes not recovered during testing, not attributable to the  
496 sediment filter, averaged  $30 \pm 8.5\%$  (mean  $\pm$  SD), and nematodes not recovered during vacuum  
497 filtration alone averaged  $22 \pm 6.2\%$ . Depending on the filter in the system, water pressure during  
498 testing ranged from 25-32 psi; the greatest pressure was seen with the 5  $\mu\text{m}$  carbon block  
499 filter. This pressure was comparable to a system with a pressure switch setting of 20-40 psi. Live  
500 nematodes, which exhibited S and Q swimming movements associated with *A. cantonensis*  
501 larvae [33], were observed in all positive filtrates except the first 1  $\mu\text{m}$  replicate filter. The  
502 majority of all pre (88%) and post-filtered (74%) nematodes was within the length range of *A.*  
503 *cantonensis* L3 larvae, which was also true of most filter replicates (Table 2). Post-filter

504 nematodes tested by real-time PCR were positive for *A. cantonensis*, except the third 5 µm  
 505 polypropylene replicate.

506

507 **Table 2. Filters tested, numbers and dimensions of nematodes pre- and post-filtration,**  
 508 **qPCR results, including nematode loss controls for the test processes and vacuum**  
 509 **filtration.**

510

| Brand                                                              | Filter # | # of nematodes post/pre (% of nematodes that traversed the filter) |                |                |       |                  | Real-time PCR (# nematodes tested) | Nematode length/ diameter (µm) |                   | % of nematodes with L3 length pre/post |
|--------------------------------------------------------------------|----------|--------------------------------------------------------------------|----------------|----------------|-------|------------------|------------------------------------|--------------------------------|-------------------|----------------------------------------|
|                                                                    |          | Run 1                                                              | Run 2          | Run 3          | Run 4 | Total            |                                    | Pre-filter                     | Post-filter       |                                        |
| 20 µm wound polypropylene, United Filters International (UP20R10P) | 1        | 10/250 (4%)                                                        | 17/250 (6.8%)  | 37/500 (7.4%)  | 0/0   | 64/1000 (6.4%)   | + (50)                             | 188-606/<br>10-34              | 196-741/<br>8-29  | 73% / 63%                              |
|                                                                    | 2        | 12/250 (4.8%)                                                      | 18/250 (7.2%)  | 31/500 (6.2%)  | 6/0   | 67/1000 (6.7%)   | + (67)                             | 342-520/<br>17-27              | 390-495/<br>20-26 | 96% / 58%                              |
| 10 µm wound polypropylene, Culligan (CW-F)                         | 1        | 37/250 (14.8%)                                                     | 26/250 (18.4%) | 99/500 (19.8%) | 23/0  | 185/1000 (18.5%) | + (82)                             | 227-540/<br>11-35              | 394-529/<br>8-28  | 91% / 84%                              |
|                                                                    | 2        | 108/250 (43.2%)                                                    | 98/250 (39.2%) | 185/500 (37%)  | 22/0  | 413/1000 (41.2%) | + (413)                            | 383-516/<br>18-29              | 250-528/<br>13-28 | 99% / 81%                              |
| 5 µm carbon block, Matrikx Accucarb (32-250-10-GREEN)              | 1        | 0/250 (0%)                                                         | 0/250 (0%)     | 0/500 (0%)     | 0/0   | 0/1000 (0%)      | n/a                                | 399-530/<br>18-33              | n/a               | 96% / n/a                              |
|                                                                    | 2        | 0/250 (0%)                                                         | 0/250 (0%)     | 0/500 (0%)     | 0/0   | 0/1000 (0%)      | n/a                                | 360-540/<br>17-42              | n/a               | 96% / n/a                              |
| 5 µm spun polypropylene, Culligan (P5)                             | 1        | 0/250 (0%)                                                         | 0/250 (0%)     | 6/500 (1.2%)   | 9/0   | 15/1000 (1.5%)   | + (15)                             | 185-1374/<br>10-68             | 192-606/<br>9-36  | 73% / 53%                              |
|                                                                    | 2        | 0/250 (0%)                                                         | 0/250 (0%)     | 1/500 (0.2%)   | 3/0   | 4/1000 (0.4%)    | + (4)                              | 239-1440/<br>13-78             | 374-755/<br>16-34 | 46% / 25%                              |
|                                                                    | 3        | 0/250 (0%)                                                         | 0/250 (0%)     | 0/500 (0%)     | 1/0   | 1/1000 (0.1%)    | - (1)                              | 342-887/<br>12-34              | 398-16            | 96% / n/a                              |
| 1 µm spun polypropylene, Culligan (P1)                             | 1        | 0/250 (0%)                                                         | 0/250 (0%)     | 0/500 (0%)     | 64/0  | 64/1000 (6.4%)   | + (64)                             | 372-512/<br>19-28              | n/a               | 94% / n/a                              |

|                                           |   |                  |                  |                  |                     |                  |       |                       |                       |               |
|-------------------------------------------|---|------------------|------------------|------------------|---------------------|------------------|-------|-----------------------|-----------------------|---------------|
|                                           | 2 | 0/250<br>(0%)    | 0/250<br>(0%)    | 0/500<br>(0%)    | 0/0                 | 0/1000<br>(0%)   | n/a   | 327-<br>553/<br>18-28 | n/a                   | 93% / n/a     |
|                                           | 3 | 0/250<br>(0%)    | 0/250<br>(0%)    | 0/500<br>(0%)    | 9/0                 | 9/1000<br>(0.9%) | + (9) | 393-<br>510/<br>19-27 | 432-<br>492/<br>20-24 | 97% /<br>100% |
| <b>Nematodes control testing</b>          |   | 200/250<br>(80%) | 168/250<br>(67%) | 160/250<br>(64%) |                     |                  |       |                       |                       |               |
| <b>Nematode control vacuum filtration</b> |   | 80/100<br>(80%)  | 86/100<br>(86%)  | 71/100<br>(71%)  | 77/10<br>0<br>(77%) |                  |       |                       |                       |               |

511

512

## 513 Genetic Analysis

514 Results for qPCR and real-time PCR of samples used in experiments are reported in each  
515 respective section above. Results using dilutions of a plasmid as standards and positive controls  
516 in qPCR and real-time PCR are reported here. Sequencing and GenBank BLAST analysis  
517 verified the plasmid ITS region as an insert (RLW Acan ITS plasmid 18675.11 sequence, 5' ->3'  
518 TATCATCGCATATCTACTATACGCATGTGACACCTGATTGACAGGAAATCTTAATGA  
519 CCC) with 100% sequence match to known *A. cantonensis* ITS sequences (GenBank accession  
520 GU587745 to GU587762) [31]. Cycle threshold ( $C_T$ ) values of the standards ranged from 15-28  
521 cycles and the plasmids were 15-32 cycles. The standard curve had an  $R^2$  value of 0.976, a slope  
522 of -3.798, a y-intercept of 20.535, and PCR efficiency of 83.354%. The mean quantities of the  
523 eight plasmid dilutions ranged from 17.3 to 0.001 larvae per reaction.

524

## 525 Discussion

526 These studies substantiate the epidemiological significance of contaminated water as a source of  
527 *A. cantonensis* transmission. We have clearly demonstrated the potential for shedding of the  
528 infective stage larvae in water from drowned *P. martensi*, a highly efficient, intermediate host,  
529 recently introduced to Hawai'i. In contrast to previous studies, our results demonstrate that  
530 undamaged *P. martensi* are capable of shedding several hundred infective stage larvae that can  
531 survive in water for several weeks. While current rainwater catchment guidelines state that a 20

532  $\mu\text{m}$  sediment filter should be sufficient to block the infective stage larvae, our findings show that  
533 live, infective-stage larvae were able to traverse 20, 10, 5, and 1 $\mu\text{m}$  commercially available  
534 wound or spun polypropylene sediment filters.

535  
536 Rainwater was never observed to contain larvae and real-time PCR results for a water sample  
537 showed no presence of *A. cantonensis* DNA. Intact, infected, drowned *P. martensi* shed  
538 significantly greater numbers of *A. cantonensis* larvae than minced *P. martensi*, and this finding  
539 did not correlate to slug weight or larval burden. Shed larvae included L1, L2 and L3 stage *A.*  
540 *cantonensis*, and in a wet environment, larvae can survive for quite some time; L1 larvae for at  
541 least 56 days and L3 up to 21 days. Previously active L3 larvae, which appeared motionless at 21  
542 days PD, were stimulated into activity by exposure to acid; however, additional studies would  
543 need to be done to determine if these were infective. Acid destroys L1- L2 larvae; the use of  
544 water (as opposed to acid) facilitated the release of these stages and preserved them for study.

545  
546 The gastropods used in this study were infected in the natural environment and likely harbored  
547 other nematode species and/or multiple stages of *A. cantonensis* larvae. As the size of different  
548 *A. cantonensis* larval stages is well-documented, a 20  $\mu\text{m}$  sieve was useful for determining larval  
549 stages. While feeding L3 larvae to rats is the gold standard for identifying nematode larvae as *A.*  
550 *cantonensis*, funding restraints precluded such studies. Real-time PCR was used to detect the  
551 presence of *A. cantonensis* DNA.

552  
553 In this study, the route through which the larvae exited the drowned slug host was not  
554 determined. Histological sectioning of *P. martensi* showed coiled larvae located very close to the  
555 body wall, and it is possible larvae may exit the slug via mucus secretions or tissue  
556 decomposition. Gastropods can produce mucus for locomotion, to maintain external body  
557 moisture, and as a defense mechanism [35], Hyperhydration and differences in somatic pressures  
558 may cause the release of mucus, especially in total immersion in water resulting in death [35],  
559 Hyperhydration may lead to blood (haemolymph) venting [36] through the pneumostome, which  
560 may have caused the release of the L1 larvae. It has been reported within the first 24 hours of  
561 infection that larvae may move throughout the slug and may be found in the hemocoel which  
562 contains haemolymph [29]. More than 300 live larvae were found 5 days PD in a mucus mass

563 that was exuded from a *P. martensi*, which at 24 hours PD contained only eight visible larvae.  
564 The origin of the shed larvae from a drowned slug could be the pneumostome, mucus glands, or  
565 tissue decomposition.

566  
567 Tissue squashes may serve as a useful method to observe larvae [4]. Larvae, both coiled and C-  
568 shaped, were clearly visible in the tissue squashes without staining. While molecular analysis is  
569 still necessary for confirmation of *A. cantonensis*, the tissue squash technique could work quite  
570 well for screening gastropods for infection. Slugs found in commercially bought salads have  
571 been brought to our lab for testing. In high infection areas such as Hawai‘i, a tissue squash may  
572 provide the visual evidence needed to immediately and prophylactically administer anthelmintic  
573 drugs in the case of human exposure.

574  
575 L1 larvae passed through a 20 $\mu$ m metal sieve, but L3 larvae were unable to traverse the sieve.  
576 While no L3 larvae were able to migrate through the 20 $\mu$ m metal sieve, the infective stage L3  
577 larvae are capable of burrowing through the intestinal wall, and while they may not be able to  
578 burrow through metal, they may be capable of migrating through a non-metal filter. We  
579 evaluated the ability of nematodes isolated from wild-caught *P. martensi* to traverse five  
580 different types of sediment filters commonly used in household catchment systems. While live  
581 nematodes were able to traverse all filters except the 5  $\mu$ m carbon-block filter, all filters  
582 significantly reduced the number of nematodes introduced to the system. We believe the  
583 structural design and differences in construction of individual filters are important variables in  
584 determining if nematodes are able to traverse the filters tested. Similar to the metal sieve, the  
585 carbon-block filter is the only filter tested that is made of inflexible material (100% coconut shell  
586 carbon) and possesses rubber seals on each end. Nematodes could not go around the carbon filter  
587 swept by water currents or swimming while the system was off, nor could they burrow or swim  
588 through the carbon filter while the system was off. While only two carbon filters of one brand  
589 were tested, future research should particularly focus on other brands and sizes of carbon block  
590 filters, with larger sample sizes, for testing effectiveness for blocking nematodes. Structural  
591 design and construction differences also likely explain the finding of more nematodes in the 10  
592  $\mu$ m filtrate than the 20  $\mu$ m filtrate, as the 10  $\mu$ m filter had thinner strings that were notably more  
593 loosely wound compared to the 20  $\mu$ m strings. There was even a clear difference in string

594 tightness between the two 10  $\mu\text{m}$  filters tested, which likely caused the large but not significant  
595 differences in the proportion of post-filter nematodes between each filter replicate. The other  
596 filters showed no significant differences in proportions of post-filter nematodes between filter  
597 replicates, indicating the construction of some filters can be consistent and produce reliable  
598 results. The diameters of the nematodes found in the filtrates were greater than the  
599 manufacturer's listed micron size. Despite all of these findings, to the best of our detection  
600 capabilities, it seems the 20  $\mu\text{m}$ , 5  $\mu\text{m}$  spun, and 1  $\mu\text{m}$  filters performed as stated by the  
601 manufacturer nominal ratings which reduce >85% of particles with the listed micron size. The 5  
602  $\mu\text{m}$  carbon block outperformed these standards, while neither replicate of the 10  $\mu\text{m}$  filter met  
603 this standard. Most commercially available catchment filters are not rated with 'absolute'  
604 microns due to their structure. We suspect that there will be some flex in the filter micron size  
605 based on the structure and material of the filter, thus most filters are considered 'nominal'.  
606

607 While other nematode species were likely present in the catchment filter tests, since some length  
608 and width measurements were larger than known for *A. cantonensis* L1-L3 larvae, the majority  
609 of pre- and post-filtered nematodes were within the length range of *A. cantonensis* L3 larvae  
610 (Table 2). Moreover, many live post-filter nematodes exhibited swimming S and Q-movement  
611 patterns indicative of *A. cantonensis* larvae [33]. Real-time PCR results of filtrates with more  
612 than one nematode were all positive, and the lack of *A. cantonensis* detection of the one  
613 nematode from the third replicate of the 5  $\mu\text{m}$  spun filter was likely due to DNA concentrations  
614 of the extraction being below the sensitivity of the real-time PCR assay. Together, the nematode  
615 sizes, swimming patterns, and genetic analyses indicate that live *A. cantonensis* larvae were  
616 among those that traversed the filters.  
617

618 This study is especially important for Hawai'i because of the widespread, unregulated use of  
619 rainwater catchment systems for household water supplies. While all of the filters, except the 10  
620  $\mu\text{m}$ , performed at or above the manufacturer's ratings, clearly there is misplaced trust by  
621 contractors, vendors, and homeowners in the effectiveness of sediment filters to completely  
622 block larger parasites like *A. cantonensis*. Outreach should be done to educate rainwater  
623 catchment users in high infection areas about the meaning of nominal filter ratings. Additional  
624 research should also verify that *A. cantonensis* cannot traverse filters with absolute filter ratings.

625 Given the limits of our detection capabilities based on the methods used, as well as the limited  
626 sample size of sediment filters tested, homeowners should be cautious in relying on the same  
627 model of filters used in their own catchment systems to perform identically to the results  
628 reported here. This study was conducted in an isolated, clean, laboratory environment which may  
629 be quite different from a homeowner's catchment system regarding reservoir debris, water pump  
630 strength, and overall system maintenance. It is unknown if the buildup of organic debris on  
631 sediment filters affects either the viability of *A. cantonensis* larvae or the filtration capabilities  
632 throughout the course of the filter's life. It is also unknown if a water pump that generates higher  
633 pressure on the sediment filter would produce different results. Moreover, homeowners should  
634 not extrapolate the results of this study to other brands of filters constructed with similar  
635 materials or micron ratings.

636

637 Disinfection treatments might play a crucial role in protecting households. Chlorine has been  
638 shown to kill microorganisms in water, including the nematode *Angiostrongylus costaricensis*  
639 [37], and has been recommended to treat catchment reservoirs [21]. Bleach, however, is not FDA  
640 approved for water treatment by private citizens and it reacts in water with natural organic matter  
641 to produce toxic halogenated volatile organic compounds called trihalomethanes [38]. NucShort-  
642 wave ultraviolet light (UVC, 254 nm) is also a widely endorsed disinfection method, however  
643 eukaryotic organisms like nematodes possess the ability to repair nuclear DNA damage from UV  
644 radiation [39]. These findings showcase that even 'properly designed' rainwater catchment  
645 systems may leave users exposed to *A. cantonensis*. Novel ideas may be needed to address this  
646 problem, not only for Hawai'i residents but also for rainwater catchment users across the globe  
647 in regions where parasitic nematodes are endemic.

648

649 It is feasible that parasitized gastropods or paratenic flatworms that perish and decompose in wet  
650 field crops, or those that are smashed in roadway puddles or drowned in small bodies of water,  
651 may release infective stage nematodes capable of disease transmission. Instances of human  
652 infection have been recorded in Texas following a flood event [40, 41], and while transmission  
653 via ingestion is generally considered the primary source of infection, a mouse study shows the  
654 potential for *A. cantonensis* transmission through oral, intraperitoneal, sub-cutaneous, lacerated  
655 and unabraded skin, anal, vaginal, conjunctival mucosal tissue, and foot pad, but not tail

656 penetration [42]. Intraperitoneal and subcutaneous injection resulted in recovery of more worms  
657 than from oral intubation. The study concluded that skin or mucosa contacts with L3 *A.*  
658 *cantonensis* larvae may be a cause of angiostrongyliasis/neuroangiostrongyliasis in the natural  
659 environment.

660  
661 Likewise, beverages left outside uncovered could become a repository for a wandering gastropod  
662 and a source of disease transmission. In Hawai'i in 2017 there were two confirmed cases and four  
663 probable cases of neuroangiostrongyliasis resulting from consumption of homemade kava, a  
664 traditional drink common to the western Pacific islands. The kava had been left in an uncovered  
665 bucket and a slug was found in the bottom of the container holding the beverage after the kava  
666 was consumed [43]. Recently, a case of neuroangiostrongyliasis was reported in Hawai'i and the  
667 victim reported drinking from a garden hose [44]. Because residents report finding *P. martensi* in  
668 hoses, this should also be considered as a potential pathway for disease transmission.

669

## 670 **Conclusion**

671 It is not improbable that the widespread use of rainwater catchment as household and agricultural  
672 water supplies may play a role in the high number of cases of neuroangiostrongyliasis originating  
673 from East Hawai'i Island, and this public health concern should be thoroughly investigated. As  
674 rainwater catchment use is unregulated in Hawai'i, systems may potentially be a cause of not  
675 only rat lungworm disease, but also other diseases found in Hawai'i, such as leptospirosis,  
676 giardia, salmonella, and *Escherichia coli* infections, all of which can be transmitted through  
677 water. It is important to understand that the Puna District of Hawai'i Island is one of the fastest  
678 growing areas in the entire U.S. due to availability of affordable land and large subdivisions that  
679 contain many lots available for sale. Without research and education-related intervention, case  
680 numbers of neuroangiostrongyliasis may continue to rise in Hawai'i. It is essential for  
681 epidemiologists to consider and investigate rainwater catchment systems as potential pathways  
682 for *A. cantonensis* transmission.

683

## 684 **ACKNOWLEDGEMENTS**



685 We thank Hawaii Catchment Co., Keaau, and Keaau Ace Hardware, Hawaii for providing filters  
686 and equipment needed to complete this study. Many thanks to Ann Kobsa, Lyn Howe and Geoff  
687 Rauch for the generous supply of gastropods, and to Deborah Beirne and the Department of  
688 Biology for the loan of a dissecting microscope for these studies. To Michael Severino we extend  
689 our sincere gratitude for your assistance with the molecular analysis of gastropod tissue. We  
690 thank Dr. Alex Hanlon for assistance with the statistical analyses, and we are very grateful to  
691 Roxana Myers and Cathy Mello from the USDA Pacific Basic Agricultural Research Center, and  
692 Dr. Adler Dillman from Stanford University, for their assistance with nematode identification.  
693 Many thanks to Patricia Macomber for her insights regarding rainwater catchment use on  
694 Hawai'i Island and Kirsten Snook for review of the manuscript. Also, a very special thank you to  
695 Dr. Marta DeMaintenon at the University of Hawai'i at Hilo for her aid and expertise in the  
696 histological preparation of gastropods.

697

## 698 **References**

- 699 1. Wallace G. D., and Rosen L. Studies on eosinophilic meningitis. V. molluscan hosts of  
700 *Angiostrongylus cantonensis* on Pacific Islands. Am J Trop Med Hyg. 1969; 81:206-216.
- 701 2. Kim, J. R., Hayes, K. A., Yeung, N. W., Cowie, R. H. Diverse gastropod hosts of  
702 *Angiostrongylus cantonensis*, the rat lungworm, globally and with a focus on the  
703 Hawaiian Islands. PLoS One. 2014 May 02; doi:10.1371/journal.pone.0094969.
- 704 3. Kim, J.R., Wong, T. M., Curry, P. A., Yeung, N.W., Hayes, K. A., Cowie, R. H.  
705 Modelling the distribution in Hawaii of *Angiostrongylus cantonensis* (rat lungworm) in  
706 its gastropod hosts. Parasitol. 2018 June 21:1-8. PubMed PMID:29925459 doi:  
707 10.1017/S0031182018001026.
- 708 4. Mackerras, M. J., and Sandars, D. F. The life history of the rat lung-worm,  
709 *Angiostrongylus cantonensis* (Chen) (Nematoda: Metastrongylidae). Aust J Zool.  
710 1954;3:1-21.
- 711 5. Alicata, J. E. Parasitic infections of man and animals in Hawaii. Hawaii Agricultural  
712 Experiment Station, College of Tropical Agriculture. University of Hawaii, Honolulu, HI.  
713 1964; 61:31-36.
- 714 6. Wang, Q.-P., Wu, Z.-D., Wei, J., Owen, R. L., Lun, Z.-R. Human *Angiostrongylus*  
715 *cantonensis*: an update. Eur J Clin Microbiol. 2012;31:389-395.

- 716 7. Barratt, J., Chan, D., Sandaradura, I., Malik, R., Spielman, D., Lee, R., et al.  
717 *Angiostrongylus cantonensis*: a review of its distribution, molecular biology and clinical  
718 significance as a human pathogen. *Parasitol.* 2016;143:1087-1118.
- 719 8. Hollingsworth, R. G., Kaneta, R., Sullivan, J. J., Bishop, H. S., Qvarnstrom, Y., da Silva,  
720 A. J., et al. Distribution of *Parmarion cf. martensi* (Pulmonata: Helicarionidae), a new  
721 semi-slug pest on Hawaii Island, and it's potential as a vector for human  
722 angiostrongyliasis. *Pac Sci.* 2007; 61:457-467.
- 723 9. Asato, R., Taira, K., Nakaurma, M., Kudaka, J., Itokazu, K., Kawanaka, M. Changing  
724 epidemiology of *Angiostrongylus cantonensis* in Okinawa Prefecture, Japan. *JPN. J*  
725 *Infect Dis.* 2004; 57:184-186.
- 726 10. Wang, Q-P, Lai, D-H., Zhu, X-Q, Chen, X-G, Lun, Z-R. Human angiostrongyliasis.  
727 *Lancet Infect Dis.* 2008; 8:621-631.
- 728 11. Cowie, R. H. Biology, systematics, live cycle, and distribution of *Angiostrongylus*  
729 *cantonensis*, the cause of rat lungworm disease. *Hawaii Journal of Medicine and Public*  
730 *Health.* 2013;72 (Suppl 2):6-8.
- 731 12. Wang, H., Lu, L., She, D., Wen, Z., Mo, Z. Li, J., et al., Eating centipedes can result in  
732 *Angiostrongylus cantonensis* infection: two case reports and pathogen investigation. *The*  
733 *Am J Trop Med Hyg.* 2018 Jul 26;99(3):743-748. doi: 10.4269/ajtmh. 18-0151.
- 734 13. Hochberg, N. S., Park, S. Y., Blackburn, B. G., Sejvar, J. J., Gaynor, K., Chung, H. et al.  
735 Distribution of eosinophilic meningitis cases attributable to *Angiostrongylus cantonensis*,  
736 Hawaii. *Emerg Infect Dis.* 2007; 13:1675-1680.
- 737 14. Graeff-Teixeira, C., Aramburu da Silva, A. C., Yoshimura, K. Update on eosinophilic  
738 meningoencephalitis and its clinical relevance. *Clin Microbiol Rev.* 2009; 22:322-348.
- 739 15. Rosen, L., Chappell, R., Laqueur, G. L., Wallace, G. D., Weinstein, P. P. Eosinophilic  
740 meningoencephalitis caused by a metastrongylid lungworm of rats. *JAMA.* 1962;  
741 179:620-624.
- 742 16. Hawai'i Department of Health. Rat Lungworm Disease in Hawai'i. Control and  
743 Prevention Legislative Report. March 2018.  
744 [https://health.hawaii.gov/docd/files/2018/05/RLWD\\_2018\\_Leg\\_Report\\_032218.pdf](https://health.hawaii.gov/docd/files/2018/05/RLWD_2018_Leg_Report_032218.pdf)
- 745 17. Hochberg, N. S., Blackburn, B. G., Park, S. Y., Sejvar, J., J., Effler, P. V., Herwaldt, B.,  
746 L. Eosinophilic meningitis attributable to *Angiostrongylus cantonensis* infection in

- 747 Hawaii: clinical characteristics and potential exposures. *Am J Trop Med Hyg.* 2011;  
748 85:685-690.
- 749 18. Jarvi, S. I., Farias, M. E. M, Howe, K., Jacquier, S., Hollingsworth, R., Pitt, W.  
750 Quantitative PCR estimates *Angiostrongylus cantonensis* (rat lungworm) infection levels  
751 in semi-slugs (*Parmarion martensi*). *Mol Biochem Parasitol.* 2012;185:174-176.
- 752 19. Qvarnstrom, Y., Bishop, H. S., da Silva, A. J. Detection of rat lungworm in intermediate,  
753 definitive and paratenic hosts obtained from environmental sources. *Hawaii J Med Public*  
754 *Health.* 2013;72 (Suppl 2):63-69.
- 755 20. Cowie, R.H., Hayes, K. A., Kim, J. R., Bustmente, K. M., Yeung, N. W. *Parmarion*  
756 *martensi* Simroth, 1893 (Gastropoda: Arionophanidae), an intermediate host of  
757 *Angiostrongylus cantonensis* (rat lungworm), on Maui. *Bishop Museum Occasional*  
758 *Papers.* 2018;123:7-10.
- 759 21. Macomber, P. S. H. Guidelines on Rainwater Catchment Systems for Hawaii. College of  
760 Tropical Agriculture and Human Resources, University of Hawaii at Manoa. 2010; pp.  
761 25-31. ISBN 1-929325-23-1.
- 762 22. Jarvi, S. I., Pitt, W. C., Farias, M. E., Shiels, L., Severino, M. G., Howe, K. M., et al.  
763 Detection of *Angiostrongylus cantonensis* in the blood and peripheral tissues of wild  
764 Hawai'i rats (*Rattus rattus*) by a quantitative PCR (qPCR) assay. *PLoS One.* 2015 Apr.  
765 24; DOI:10.1371/journal.pone.0123064.
- 766 23. State of Hawaii Department of Health.  
767 [http://health.hawaii.gov/docd/files/2015/03/Disease-Summary-Table-](http://health.hawaii.gov/docd/files/2015/03/Disease-Summary-Table-2004_2013_State.pdf)  
768 [2004\\_2013\\_State.pdf](http://health.hawaii.gov/docd/files/2015/03/Disease-Summary-Table-2004_2013_State.pdf)
- 769 24. Cooper, G., Daws, G. Land and Power in Hawai'i. University of Hawaii Press. 1990. p.  
770 259-277.
- 771 25. Donohue, M. J., Macomber, P. S. H., Okimoto, D., Lerner, D.T. Survey of rainwater  
772 catchment use and practices on Hawaii island. *Journal of Contemporary Water Research*  
773 *and Education.* 2017;161:33-47.
- 774 26. Ash, L. R. Diagnostic morphology of the third-stage larvae of *Angiostrongylus*  
775 *cantonensis*, *Angiostrongylus vasorum*, *Aelurostrongylus abstrusus*, and *Anafilaroides*  
776 *rostratus* (Nematoda: Metastrongyloidea). *J Parasitol.* 1970;56:249-253.

- 777 27. Harrison, J. F. Water Quality Association, Glossary of Terms. Wes McGowan. 2000.  
778 Fourth Edition, 3-97.
- 779 28. Cheng, T. C., and Alicata, J. E. Possible role of water in the transmission of  
780 *Angiostrongylus cantonensis* (Nematoda: Metastrongylidae). J Parasitol. 1964;(3 Suppl  
781 2):39-40.
- 782 29. Richards, C. S., and Merritt, J. W. Studies on *Angiostrongylus cantonensis* in molluscan  
783 intermediate hosts. J Parasitol. 1967; 53:382-388.
- 784 30. Crook, J. R., Fulton, S. E., Supanwong, K. The infectivity of third stage *Angiostrongylus*  
785 *cantonensis* larvae shed from drowned *Achatina fulica* snails and the effect of chemical  
786 agents on infectivity. Trans R Soc Trop Med Hyg. 1971;65:602-605.
- 787 31. Qvarnstrom, Y., Aramburu da Silva, A. C., Teem, J. L., Hollingsworth, R., Bishop, H.,  
788 Graeff-Teixeira, C., et al. Improved molecular detection of *Angiostrongylus cantonensis*  
789 in mollusks and other environmental samples with a species-specific internal transcribed  
790 spacer 1-based TaqMan assay. Appl Environ Microbiol. 2010;76:5287-5289.
- 791 32. Presnell, J. K., Schreibman, M. P. 1997. Humanson's animal tissue techniques. 5th ed.,  
792 John Hopkins University Press, Baltimore. ISBN 0801854016.
- 793 33. Lv, S., Zhang, Y., Zhang, C., Steinmann, P., Zhou, X., Utzinger, J. *Angiostrongylus*  
794 *cantonensis*: morphological and behavioral investigation within the freshwater snail  
795 *Pomacea canaliculata*. Parasitol Res. 2009 May;104(6):1351-1359
- 796 34. Zeng, X., Wei, J., Wang, J., Wu, F., Fung, F., Wu, X., et al. *Angiostrongylus cantonensis*:  
797 Scanning electron microscope observations on the cuticle of moulting larvae. Korean J  
798 Parasitol. 2013;51:633-636.
- 799 35. Baker, G. M. The Biology of Terrestrial Mollusks. CABI Publishing. 10 E 40th Street,  
800 Suite 3203, New York, NY 10016. 2001. pp.157, 165-169, 289.
- 801 36. Martin, A. W., Deyrup-Olsen, I. Blood venting through the pneumostome in terrestrial  
802 slugs. Comp Biochem Physiol. 1982;72:53-58.
- 803 37. Zanini, G.M., Graeff-Teixeira, C. Inactivation of infective larvae of *Angiostrongylus*  
804 *costaricensis* with short term incubations in 1.5% bleach solution, vinegar, or saturated  
805 cooking salt solution. Acta Tropica. 2001;78:17-21.

- 806 38. Nuckols, J.R., Ashley D.L., Lyu, C., Gordon, S.M., Hinckley, A.F., Singer, P. Influence  
807 of tap water quality and household water use activities on indoor air and internal dose  
808 levels of trihalomethanes. *Environ Health Perspect.* 2005;113(7):863-870.
- 809 39. Leung, M.C.K., Rooney, J.P., Ryde, I.T., Bernal, A.J., Bess, A.S., Crocker, T.L. Effects  
810 of early life exposure to ultraviolet C radiation on mitochondrial DNA content,  
811 transcription, APT production, and oxygen consumption in *developing Caenorhabditis*  
812 *elegans*. *BMC Pharmacol Toxicol.* 2013 Feb 04;14:9. doi: 10.1186/2050-6511-14-9.
- 813 40. Foster, C. E., Nicholson, E. G., Chun, A. C., Gharfeh, M., Anvari, S., Seeborg, F. O., et  
814 al. *Angiostrongylus cantonensis* infection: A cause of fever of unknown origin in  
815 pediatric patients. *Clin Infect Dis.* 2016;63:1475-1478.
- 816 41. Hammoud, R. A., Nayas, S. L., Murphy, J. R., Heresi, G. Pl. Butler, I., J., Pérez, N.  
817 *Angiostrongylus cantonensis* meningitis and myelitis, Texas USA. *Emerg Infect Dis.*  
818 2017; 23:1037-1038.
- 819 42. Wang, L-C., Chao, D., Chen, W-R. Experimental infection routes of *Angiostrongylus*  
820 *cantonensis* in mice. *J Helminthol.* 1991; 65:296-300.
- 821 43. Office of the Governor of Hawaii. DOH News Release: Hawaii Department of Health  
822 confirms two cases of rat lungworm on Hawaii Island with four probable cases.  
823 2017;Apr.19. [https://governor.hawaii.gov/newsroom/latest-news/doh-news-release-](https://governor.hawaii.gov/newsroom/latest-news/doh-news-release-hawaii-department-of-health-confirms-two-cases-of-rat-lungworm-on-hawaii-island-with-four-probable-cases/)  
824 [hawaii-department-of-health-confirms-two-cases-of-rat-lungworm-on-hawaii-island-](https://governor.hawaii.gov/newsroom/latest-news/doh-news-release-hawaii-department-of-health-confirms-two-cases-of-rat-lungworm-on-hawaii-island-with-four-probable-cases/)  
825 [with-four-probable-cases/](https://governor.hawaii.gov/newsroom/latest-news/doh-news-release-hawaii-department-of-health-confirms-two-cases-of-rat-lungworm-on-hawaii-island-with-four-probable-cases/).
- 826 44. Office of the Governor of Hawaii. DOH News Release: DOH launches first statewide  
827 media campaign on rat lungworm disease prevention. 2017; Dec 19.  
828 [https://governor.hawaii.gov/newsroom/latest-news/doh-launches-first-statewide-media-](https://governor.hawaii.gov/newsroom/latest-news/doh-launches-first-statewide-media-campaign-on-rat-lungworm-disease-prevention/)  
829 [campaign-on-rat-lungworm-disease-prevention/](https://governor.hawaii.gov/newsroom/latest-news/doh-launches-first-statewide-media-campaign-on-rat-lungworm-disease-prevention/)

830

## 831 **Supporting information**

832 **S1 Fig. Many and various sized larvae.** Larvae appeared in samples taken at 24 and 48-hours  
833 PD from drowned gastropods. Low numbers were visible in the dish upon initial inspection,  
834 however numbers of larvae in the petri increased over time, peaking at days seven and eleven.  
835 <https://www.youtube.com/watch?v=CkLCBeqFRW4>

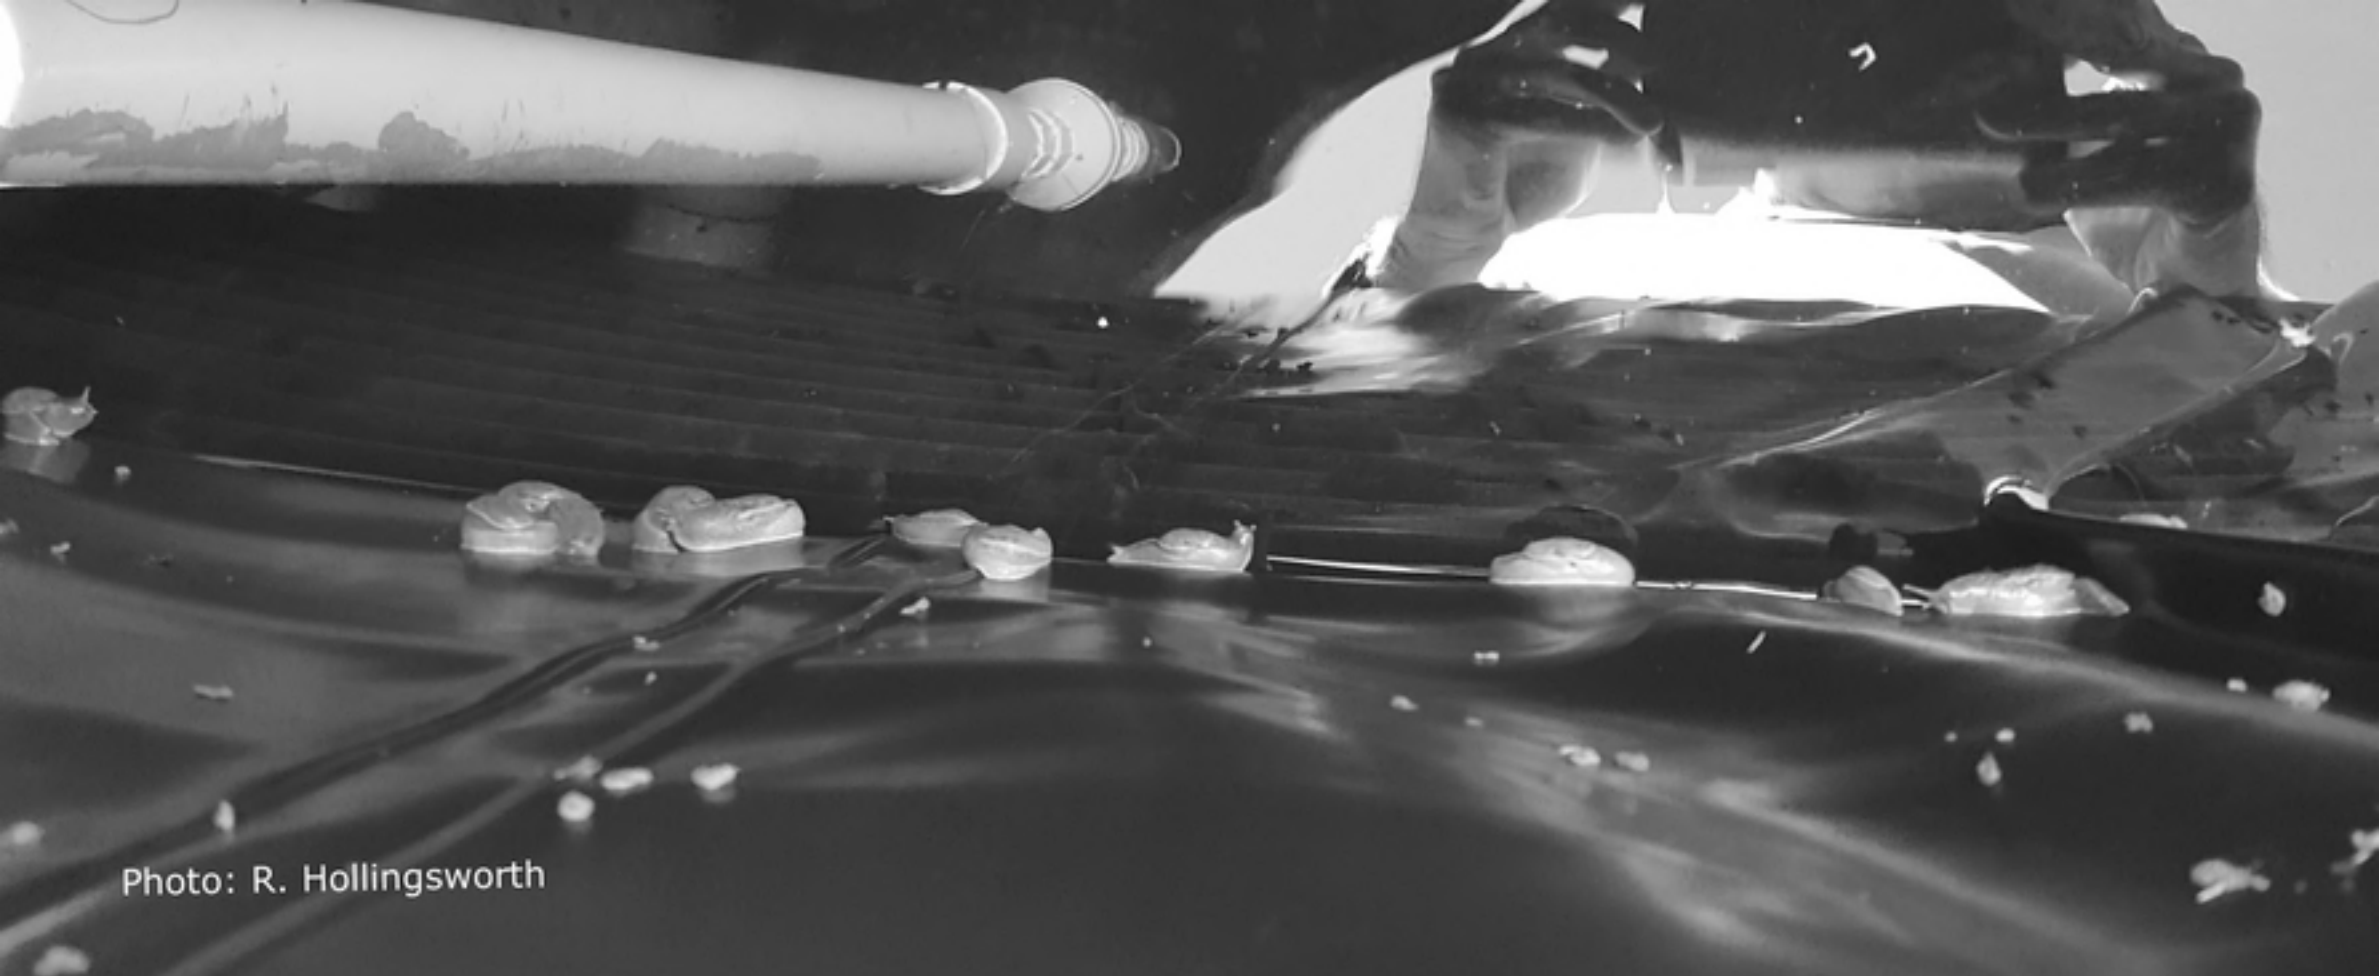

Photo: R. Hollingsworth

Figure

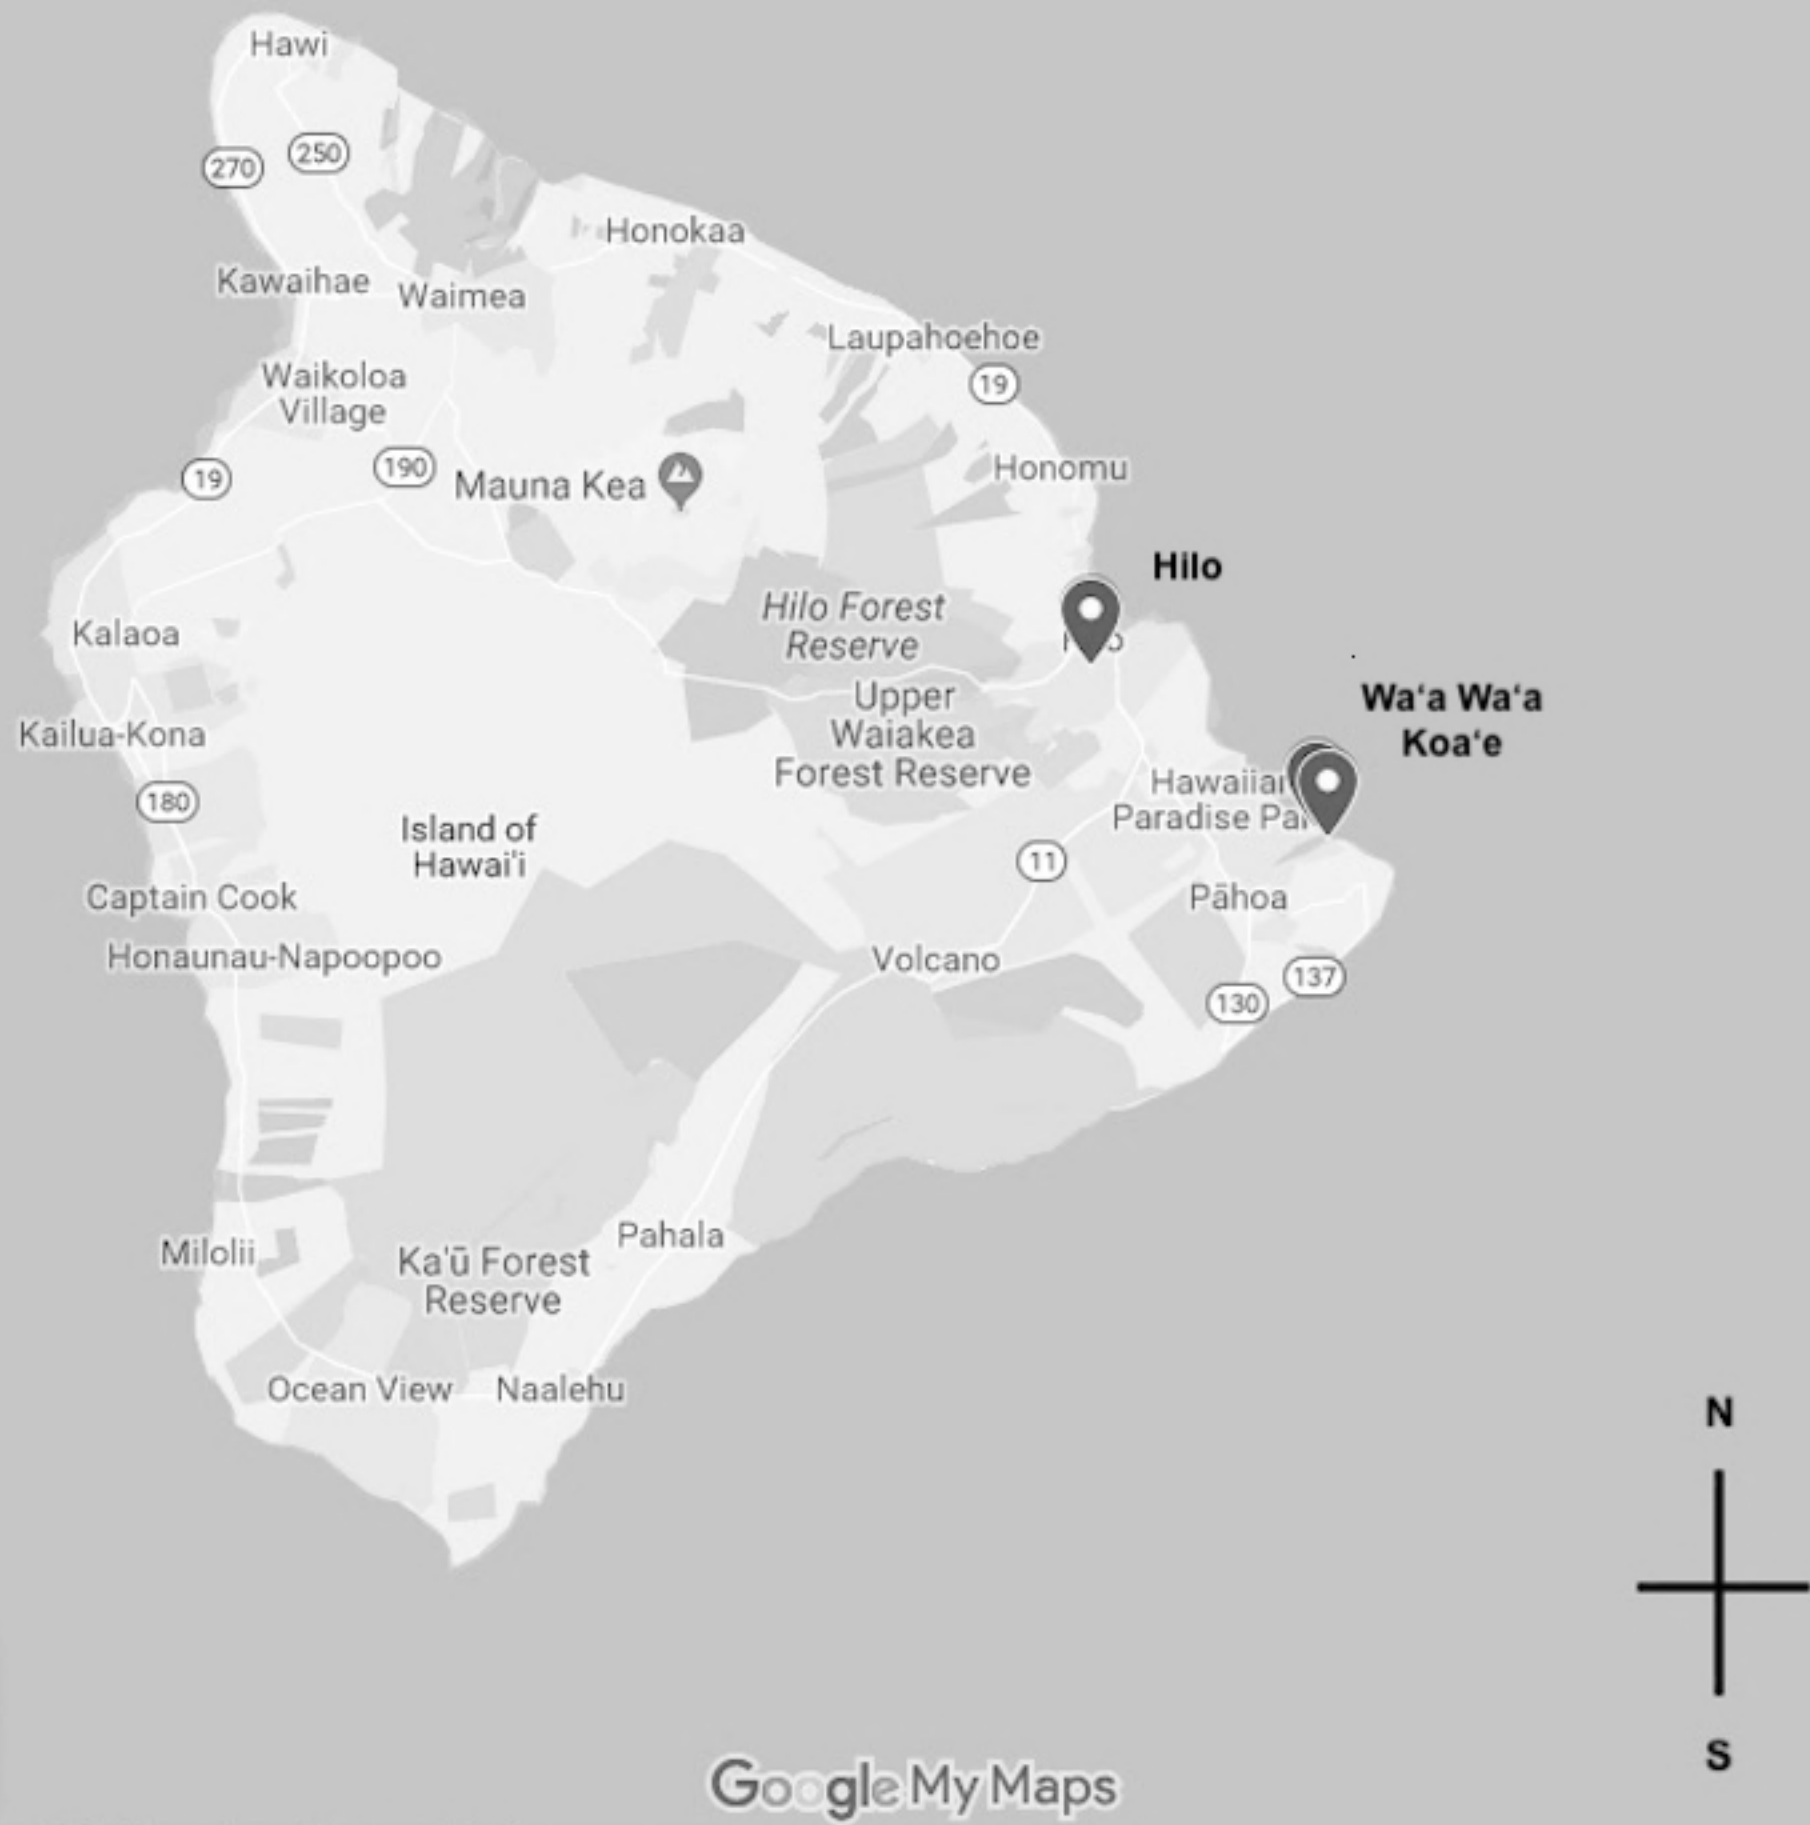

Figure

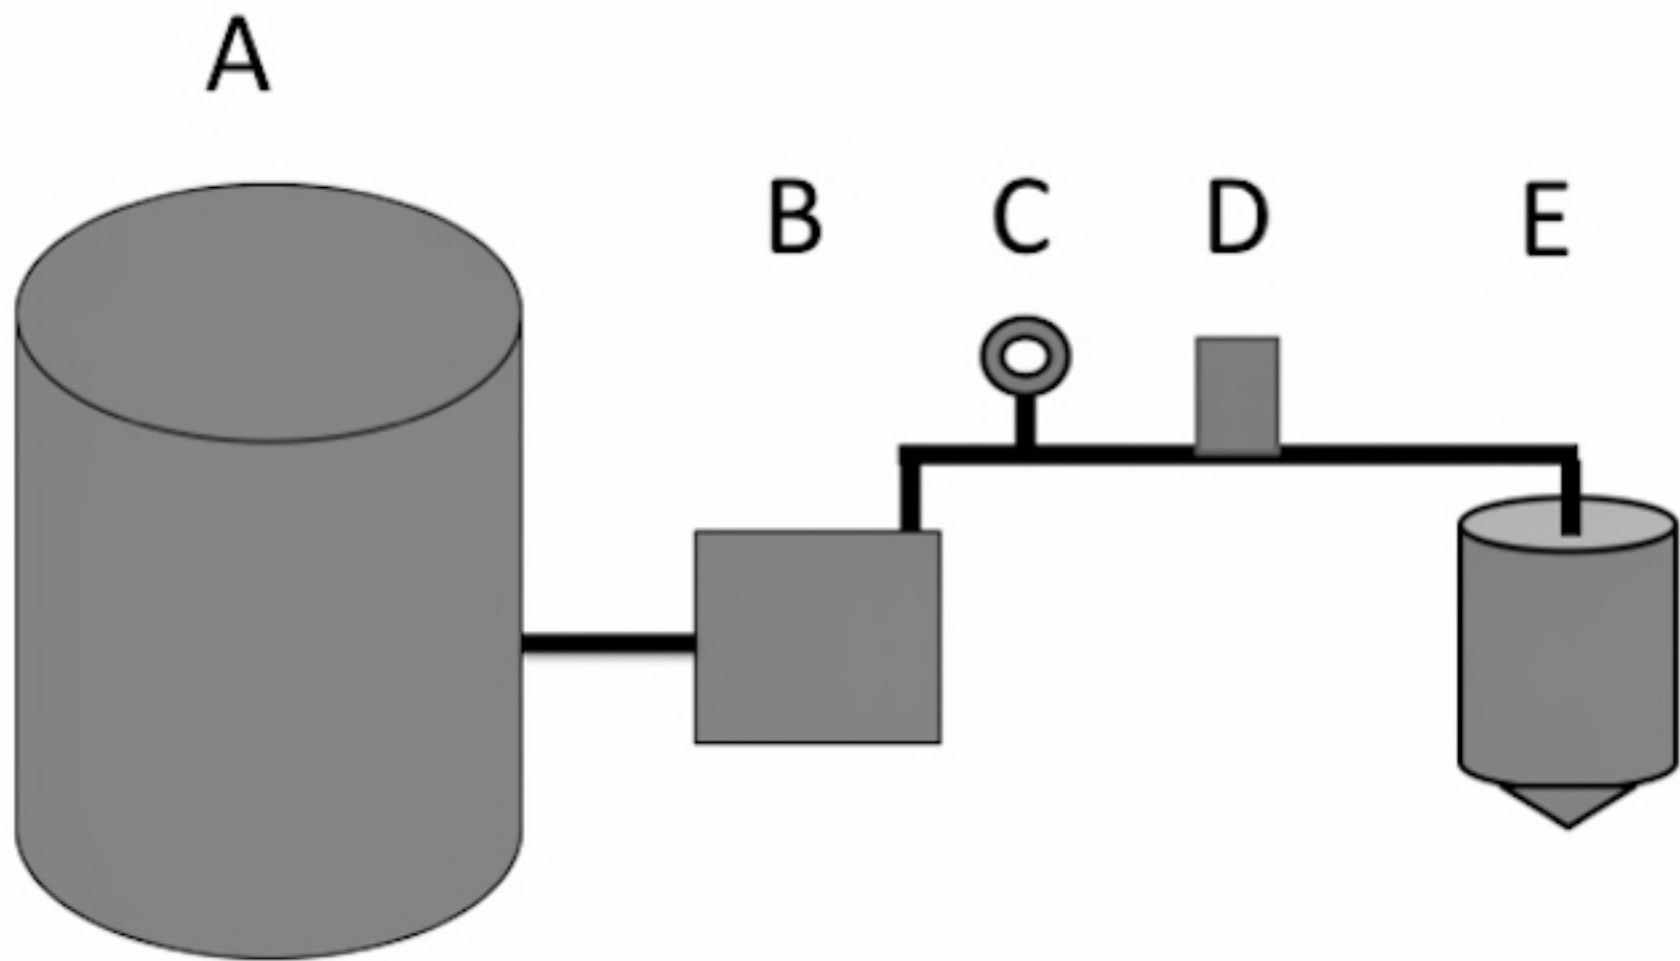

Figure



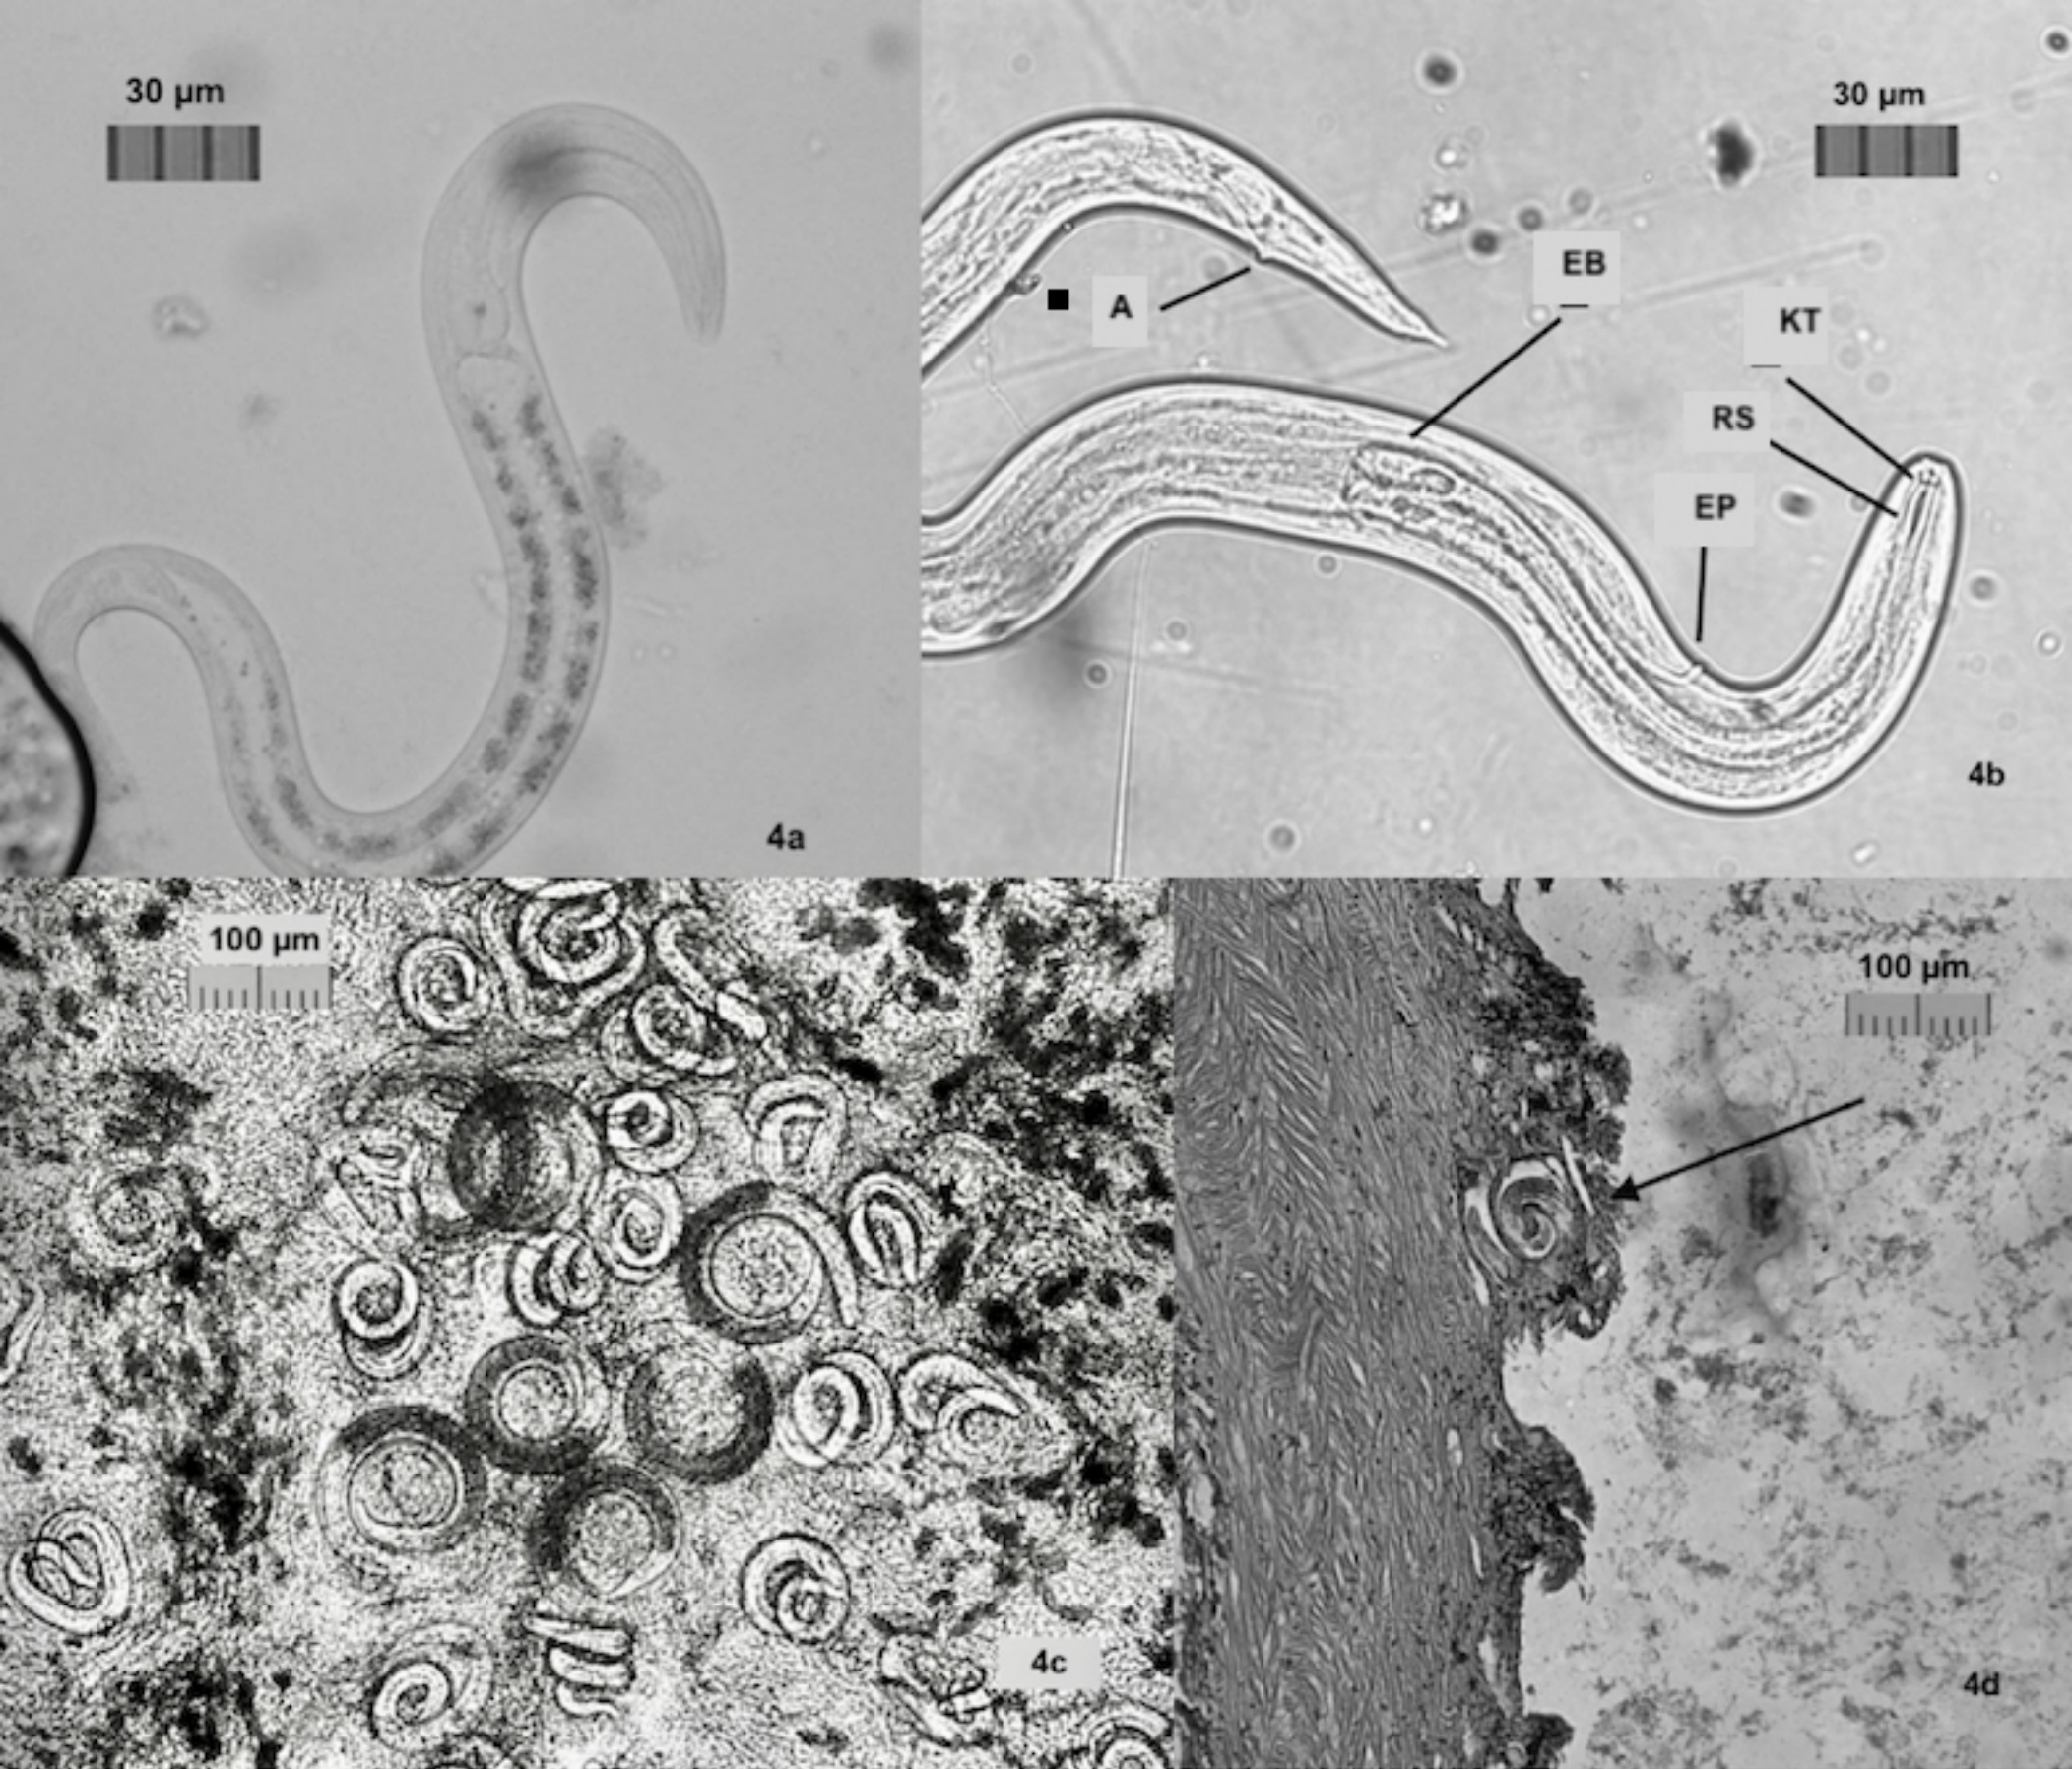

Figure
